# Supplementary material for: A polymer rigidity probe based on ultralong organic room temperature phosphorescence of a new skeleton benzo[4,5]imidazo[1,2-a]pyridine
Source: Royal Society of Chemistry journal article supplement (doi:10.1039/d4tc02846e), 2024-01-01
Supplement: d4tc02846e1.pdf [file d4tc02846e1.pdf]

# Supporting Information

## A Polymer Rigidity Probe Based on Ultralong Organic Room Temperature Phosphorescence of A New Skeleton Benzo[4,5]imidazo[1,2-a]pyridine

Jiixin Ma,<sup>a</sup> Jingjuan Bai,<sup>a</sup> Lin Han,<sup>a</sup> Xingda Zhang,<sup>a</sup> Yiran Liu,<sup>a</sup> Lijuan Bu,<sup>c</sup> Zewei Li,<sup>b</sup> Mingxing Chen,<sup>b</sup> Zhimin Ma<sup>b</sup> and Zhiyong Ma<sup>\*,a</sup>

- 
- [a] Prof. Z.Y. Ma, Miss. J.X. Ma, Miss. J.J. Bai, Mr. L. Han, Mr X.D. Zhang, Mr Y.R. Liu  
Beijing Advanced Innovation Center for Soft Matter Science and Engineering, State Key Laboratory of Organic-Inorganic Composites,  
College of Chemical Engineering, Beijing University of Chemical Technology, Beijing 100029, China. E-mail: [mazhy@mail.buct.edu.cn](mailto:mazhy@mail.buct.edu.cn).
- [b] Dr. Z.M. Ma, Dr. Mr. M.X. Chen, Mr. Z.W. Li  
College of Engineering, Peking University, Beijing 100871, China.
- [c] Dr. L.J. Bu  
Chinese PLA Center for Disease Control and Prevention, Beijing 100071, China.

## **Table of Contents**

|                                                                     |           |
|---------------------------------------------------------------------|-----------|
| <b>1. Materials and General Methods</b>                             | <b>3</b>  |
| <b>2. Syntheses and characterizations</b>                           | <b>4</b>  |
| <b>3. NMR spectra and HR-MS of the mentioned molecules</b>          | <b>7</b>  |
| <b>4. Photophysical properties in solution</b>                      | <b>12</b> |
| <b>5. Photophysical properties in the solid state.</b>              | <b>14</b> |
| <b>6. Photophysical properties in PMMA film and PVA film.</b>       | <b>16</b> |
| <b>7. Photophysical properties of BNPy-1/BNPy-2 doped into DMAP</b> | <b>20</b> |
| <b>8. Photophysical properties in the AA/MA copolymerized film</b>  | <b>25</b> |
| <b>9. TD-DFT results</b>                                            | <b>34</b> |
| <b>References</b>                                                   | <b>40</b> |

## 1. Materials and General Methods

All the solvents and reactants were purchased from commercialized companies and used as received without further purification except for specifying otherwise.

$^1\text{H}$  NMR was recorded on the 400 MHz (Bruker ARX400) and  $^{13}\text{C}$  NMR spectra were recorded on the Bruker 101 MHz spectrometer at room temperature with  $\text{CDCl}_3$  and  $\text{DMSO-}d_6$  as the solvents and tetramethylsilane (TMS) as the internal standard. ESI high resolution mass-spectra (HR-MS) were acquired on a Waters Xevo G2 Qt of mass spectrometer. Transient and delayed photoluminescence spectra were performed on the Hitachi F-4600 or Edinburgh Instruments FLS1000 fluorescence spectrophotometer. Luminescence lifetime were acquired on the Edinburgh Instruments FLS1000 fluorescence spectrophotometer or Deltaflex Fluorescence Lifetime Instrument ( $\lambda_{\text{ex}}=365$  nm). The lifetimes are fitted with the software that comes with the Edinburgh Instruments FLS1000 instrument to give the appropriate order of fit. The program uses a double exponential function fit. The lifetime fitting equation is  $\tau=(B_1\tau_1+B_2\tau_2)/(B_1+B_2)$ .

TD-DFT calculations were conducted on Gaussian 09 program with a method similar to previous literature.<sup>1</sup> Ground state ( $S_0$ ) geometries of BNPpy, BNPpy-1 and BNPpy-2 monomer were directly optimized in vacuum condition. On the basis of this, exciton energies in singlet ( $S_n$ ) and triplet states ( $T_n$ ) were estimated through a combination of TDDFT and B3LYP at the 6-311+G (p, d) level. We have to emphasize that the computed singlet and triplet levels in this article refer to emission (excited state optimization). Kohn-Sham frontier orbital analysis was subsequently performed based on the results of theoretical calculation to elucidate the mechanisms of possible singlet-triplet intersystem crossings, in which the channels from  $S_1$  to  $T_n$  were believed to share part of the same transition orbital compositions. Herein, energy levels of the possible  $T_n$  states were considered to lie within the range of  $E_{S_1}\pm 0.3$  eV.<sup>2</sup> Spin-orbital couplings (SOC) matrix elements were conducted through the Beijing Density Functional (BDF) program based on optimized or single crystal structures at the B3LYP/6-311G\* level.

## 2. Syntheses and characterizations

**BNPy:** 2-iodoaniline (2.5 mmol, 548.0 mg), Cs<sub>2</sub>CO<sub>3</sub> (7.5 mmol, 2444.0 mg), CuI (0.5 mmol, 95.0 mg), 1,10-phenanthroline (1.0 mmol, 180.0 mg) were added to a 100 mL Shrek bottle. Fill the Shrek bottle with nitrogen, and then add 2-iodopyridine (3.0 mmol, 615.0 mg) and xylene (5 ml, AR grade). The mixed solution was refluxed at 120 °C for 48 h in nitrogen atmosphere. After the reaction was over, the resultant mixture was cooled down to room temperature and the solvent was removed under reduced pressure. The crude product was purified by silica gel column using petroleum ether and ethyl acetate as the eluent to obtain pure product as white powder. Yield: 82%.

<sup>1</sup>H NMR (400 MHz, CDCl<sub>3</sub>) δ (ppm): 8.50 (dt, J = 6.9, 1.2 Hz, 1H), 8.01 – 7.90 (m, 2H), 7.74 (dt, J = 9.3, 1.2 Hz, 1H), 7.57 (ddd, J = 8.3, 7.1, 1.1 Hz, 1H), 7.51 – 7.37 (m, 2H), 6.89 (td, J = 6.7, 1.1 Hz, 1H).

<sup>13</sup>C NMR (101 MHz, CDCl<sub>3</sub>) δ (ppm): 148.42, 144.36, 129.41, 125.72, 121.07, 119.90, 118.00, 110.42, 110.35.

HR-ESI-MS Calcd. For C<sub>11</sub>H<sub>8</sub>N<sub>2</sub> [M+H]<sup>+</sup>: 169.0766. Found: 169.0813.

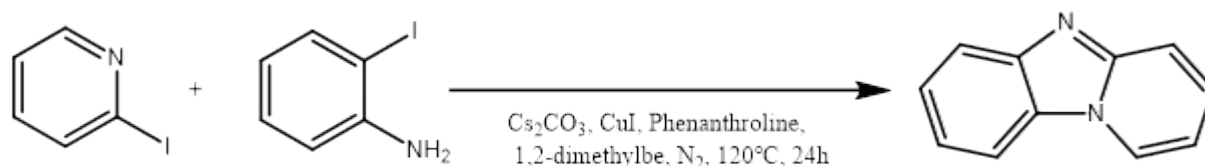

**Scheme S1.** The synthetic route to BNPy.

**BNPy-1:** Quinolin-2-amine (2.4 mmol, 345.6 mg), Sodium tert-butoxide (4.0 mmol, 384.4 mg), Pd(OAc)<sub>2</sub> (0.06 mmol, 13.5 mg), (oxybis(2,1-phenylene))bis(diphenylphosphine) (0.06 mmol, 32.3 mg) were added to a 100 mL shrek bottle. Fill the Shrek bottle with nitrogen, and then add 1-bromo-2-iodobenzene (2.0 mmol, 564.0 mg) and toluene (8 ml, AR grade). The mixed solution was refluxed at 110 °C for 48 h in nitrogen atmosphere. After the reaction was over, the resultant mixture was cooled down to room temperature and the solvent was removed under reduced pressure. The crude product was purified by silica gel column using petroleum ether and ethyl acetate as the eluent to obtain pure product as yellow powder. Yield: 60%.

<sup>1</sup>H NMR (400 MHz, CDCl<sub>3</sub>) δ (ppm): 8.54 (d, J = 8.5 Hz, 1H), 8.40 – 8.33 (m, 1H), 8.05 – 7.98 (m, 1H), 7.81 (dd, J = 7.8, 1.6 Hz, 1H), 7.72 (ddd, J = 8.6, 7.2, 1.6 Hz, 1H), 7.67 (d, J = 9.5 Hz, 1H), 7.61 (d, J = 9.4 Hz, 1H), 7.53 (td, J = 8.1, 7.7, 1.2 Hz, 1H), 7.47 (qd, J = 8.1, 1.2 Hz, 2H).



$^{13}\text{C}$  NMR (101 MHz,  $\text{CDCl}_3$ )  $\delta$  (ppm): 148.26, 144.74, 135.72, 131.23, 130.91, 129.69, 129.56, 124.46, 124.20, 123.46, 122.69, 120.53, 117.79, 115.27, 114.01.

HR-ESI-MS Calcd. For  $\text{C}_{15}\text{H}_{10}\text{N}_2$   $[\text{M}+\text{H}]^+$ : 219.0922. Found: 219.0916.

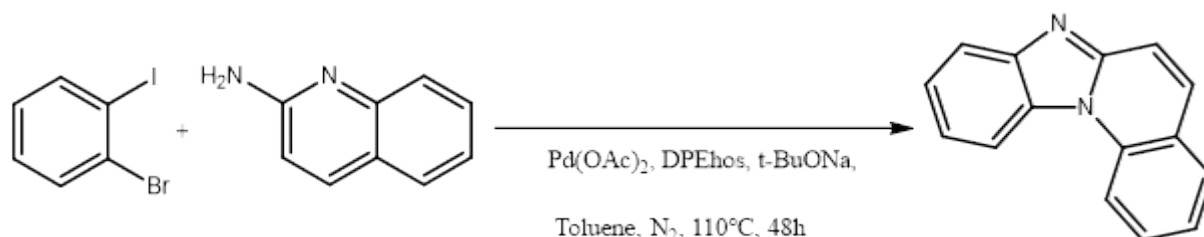

**Scheme S2.** The synthetic route to BNPy-1.

**N-(naphthalen-2-yl)pyridin-2-amine:** Naphthalen-2-ylboronic acid (2.0 mmol, 344.0 mg), Pyridin-2-amine (2.4 mmol, 225.6 mg),  $\text{Cu}(\text{OAc})_2$  (0.2 mmol, 180.0 mg) and Dichloromethane (5 ml, AR grade) were added to a 50 mL round bottom flask. The mixed solution was reacted at room temperature for 10 h in air conditions. After the reaction was over, the crude product was purified by silica gel column using petroleum ether and ethyl acetate as the eluent to obtain pure product as light brown powder. Yield: 78%.

$^1\text{H}$  NMR (400 MHz,  $\text{CDCl}_3$ )  $\delta$  (ppm): 8.28 (d,  $J = 4.0$  Hz, 1H), 7.84 - 7.74 (m, 4H), 7.55 - 7.51 (m, 1H), 7.47 - 7.36 (m, 3H), 7.00 (d,  $J = 8.4$  Hz, 1H), 6.78 (dd,  $J = 6.8$  Hz,  $J = 5.2$  Hz, 1H).

**BNPy-2:** Add  $\text{PhI}(\text{OAc})_2$  (0.2 mmol, 64.4 mg) and mCPBA (1.0 mmol, 172.57 mg) and p-toluenesulphonic acid monohydrate (2.0 mmol, 380.4 mg) to a solution of N-aryl-2-aminopyridine (1.0 mmol, 220.0 mg) in water 4 mL. The mixed solution was reacted at room temperature for 6 h in air conditions. After the reaction was over, the crude product was purified by silica gel column using petroleum ether and ethyl acetate as the eluent to obtain pure product as yellow powder. Yield: 10%.

$^1\text{H}$  NMR (400 MHz,  $\text{CDCl}_3$ )  $\delta$  (ppm): 9.15 (d,  $J = 6.9$  Hz, 1H), 8.51 (d,  $J = 8.3$  Hz, 1H), 8.10 (d,  $J = 8.0$  Hz, 1H), 8.03 (d,  $J = 8.8$  Hz, 1H), 7.94-7.89 (m, 2H), 7.75 (dd,  $J = 7.6, 7.4$  Hz, 1H), 7.57 (dd,  $J = 7.5, 7.4$  Hz, 1H), 7.48 (dd,  $J = 8.4, 7.2$  Hz, 1H), 7.07 (dd,  $J = 6.7, 6.7$  Hz, 1H).

$^{13}\text{C}$  NMR (101 MHz,  $\text{CDCl}_3$ )  $\delta$  (ppm): 147.70, 143.23, 130.27, 129.93, 127.61, 126.96, 126.87, 126.78, 123.92, 122.92, 121.53, 120.12, 119.08, 118.24, 111.78.

HR-ESI-MS Calcd. For  $\text{C}_{15}\text{H}_{10}\text{N}_2$   $[\text{M}+\text{H}]^+$ : 219.0922. Found: 219.0948.

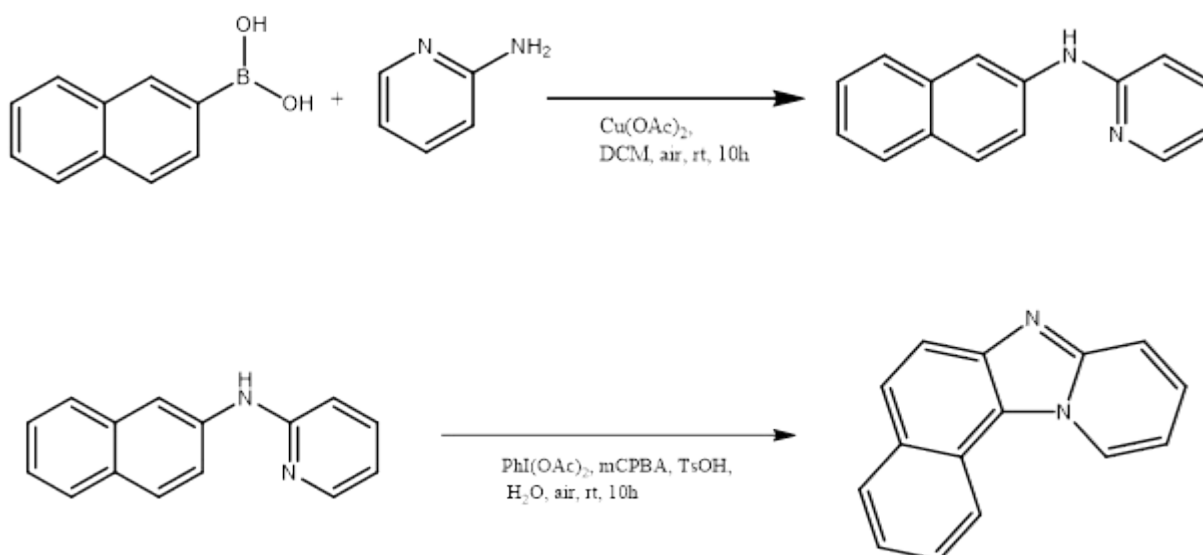

**Scheme S3.** The synthetic route to BNPY-2.

**Preparation of doped PMMA film:** Dissolve chromophore (2 mg) and polymethyl methacrylate (200 mg) in dichloromethane (2 ml); ultrasonicate the mixture for about 30 min to obtain a homogeneous mixed solution; and finally pour it into a petri dish, and wait for the solvent to evaporate naturally to obtain the colourless and transparent PMMA film.

**Preparation of doped PVA film:** The chromophore (0.2 mg) was dissolved in dimethyl sulfoxide (20  $\mu$ l). 4 ml aqueous PVA (200 mg) solution was added and the mixture was kept being stirred for 30 minutes at 100 degrees Celsius. The resulting solution was then sonicated at 60 degrees Celsius for 1 hour to complete the doping process. Transparent films were made by dropping the solution into the prepared petri dishes and kept at 70 degree Celsius for 8 hours.

**Preparation of copolymerized PAA-PMA film:** MA, AA, BNPY-1/BNPY-2 (0.1 wt%) and photoinitiator (ethoxy benzoin, 1.0 wt%) were accurately weighed and thoroughly mixed, and the mixed solution was injected into a closed transparent mould with a syringe, and then irradiated with a 365 nm UV lamp (5 W) for about 3 minutes to obtain a transparent copolymer film. Excitingly, phosphorescence intensity and phosphorescence lifetime of BNPY-1/BNPY-2 varied significantly along with the increasing AA weight ratio.

### 3. NMR spectra and HR-MS of the mentioned molecules

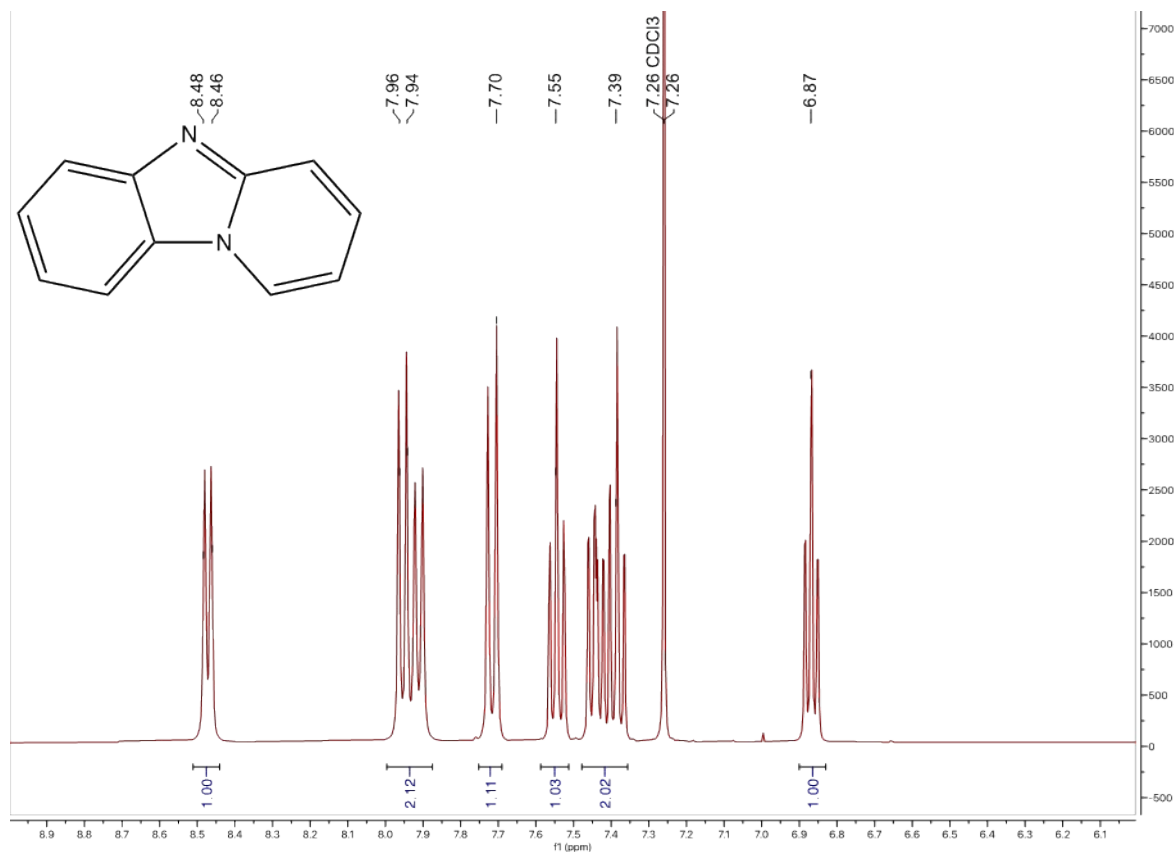

Figure S1. <sup>1</sup>H NMR spectrum of BNPy in Chloroform-*d*.

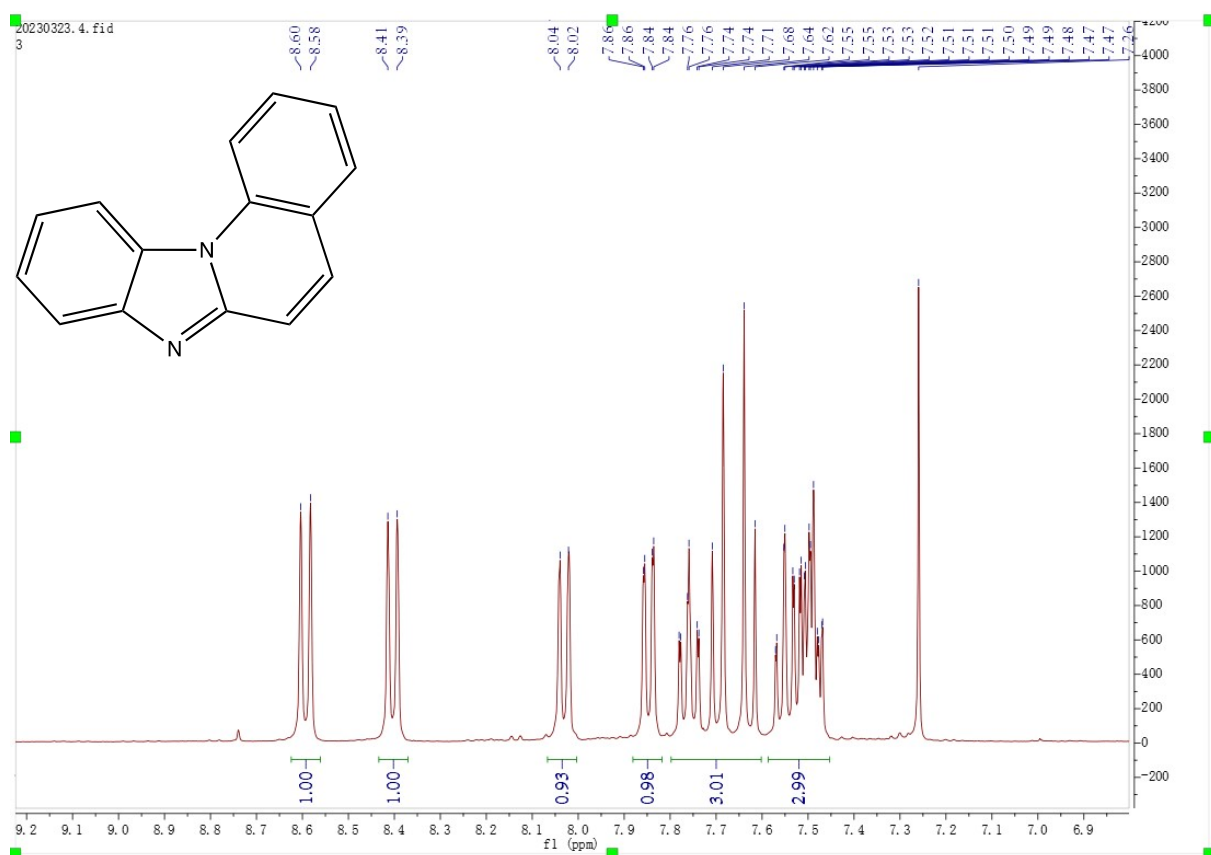

Figure S2. <sup>1</sup>H NMR spectrum of BNPy-1 in Chloroform-*d*.

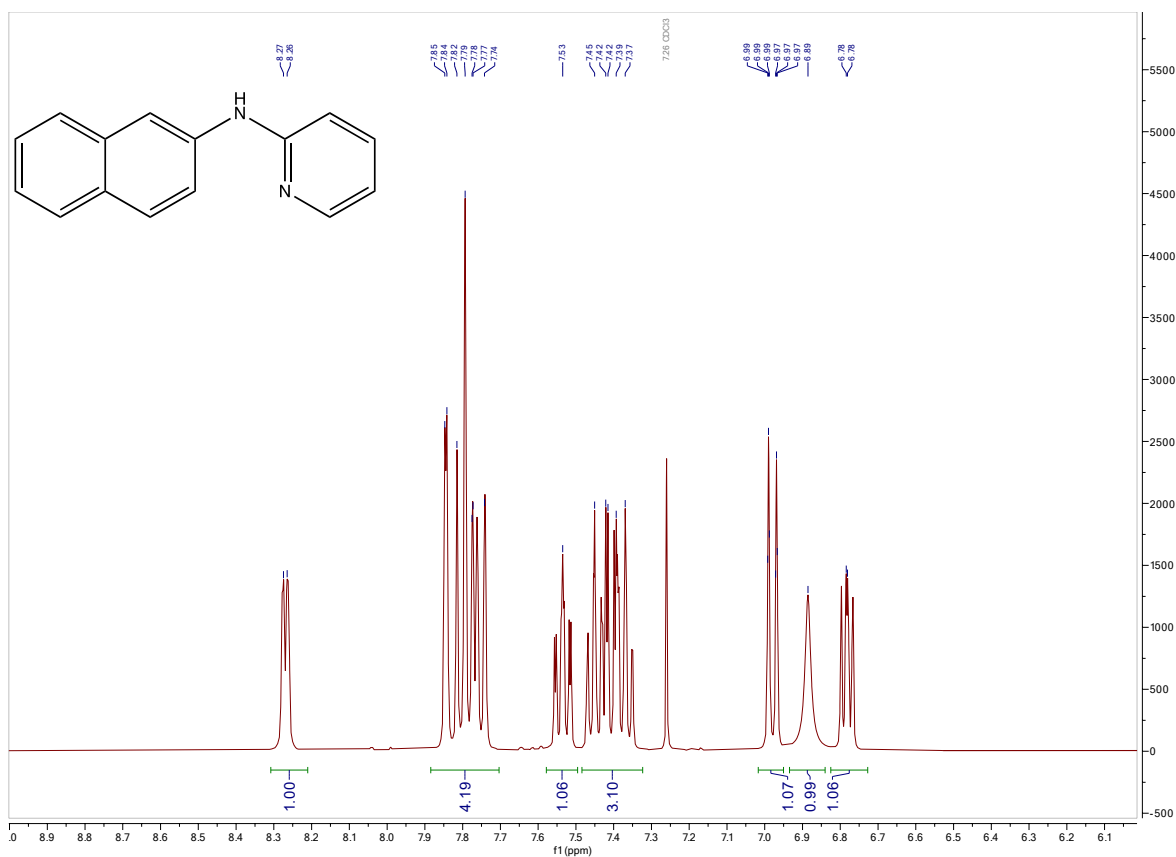

Figure S3. <sup>1</sup>H NMR spectrum of N-(naphthalen-2-yl)pyridin-2-amine in Chloroform-*d*.

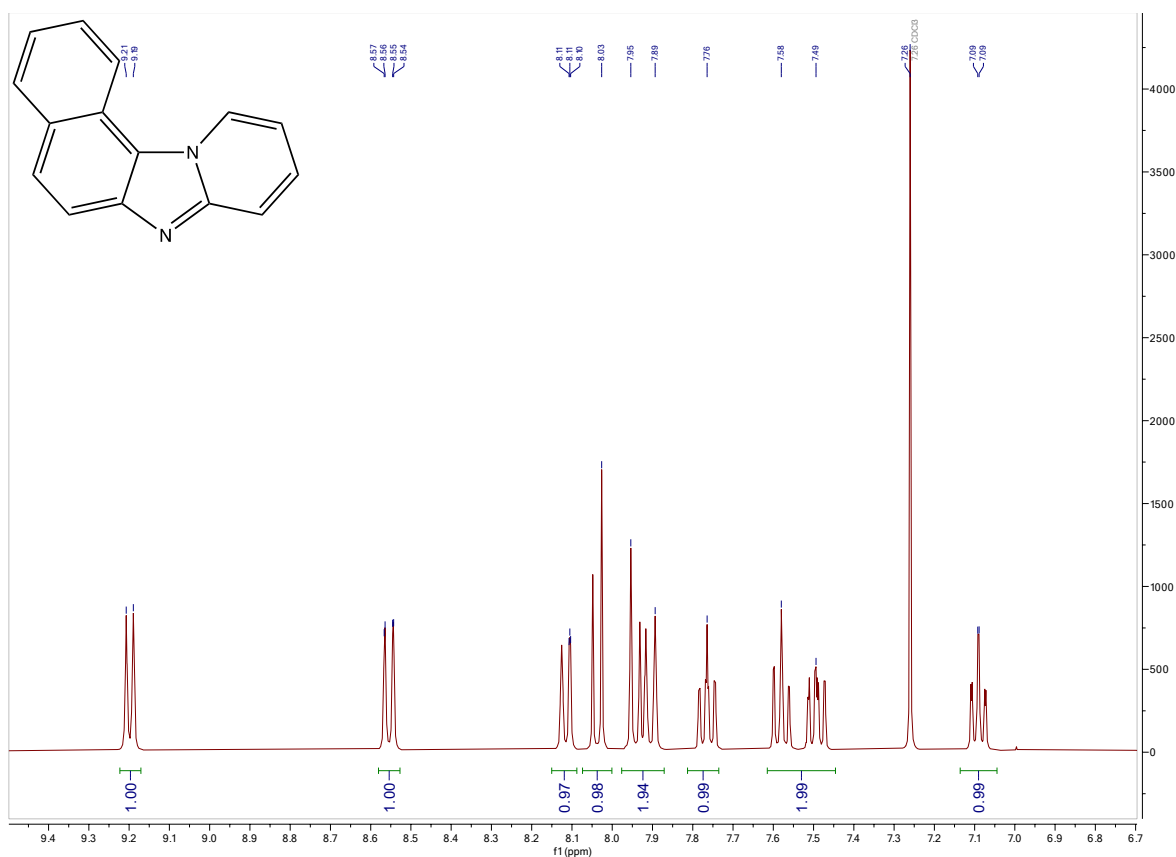

Figure S4. <sup>1</sup>H NMR spectrum of BNPy-2 in Chloroform-*d*.

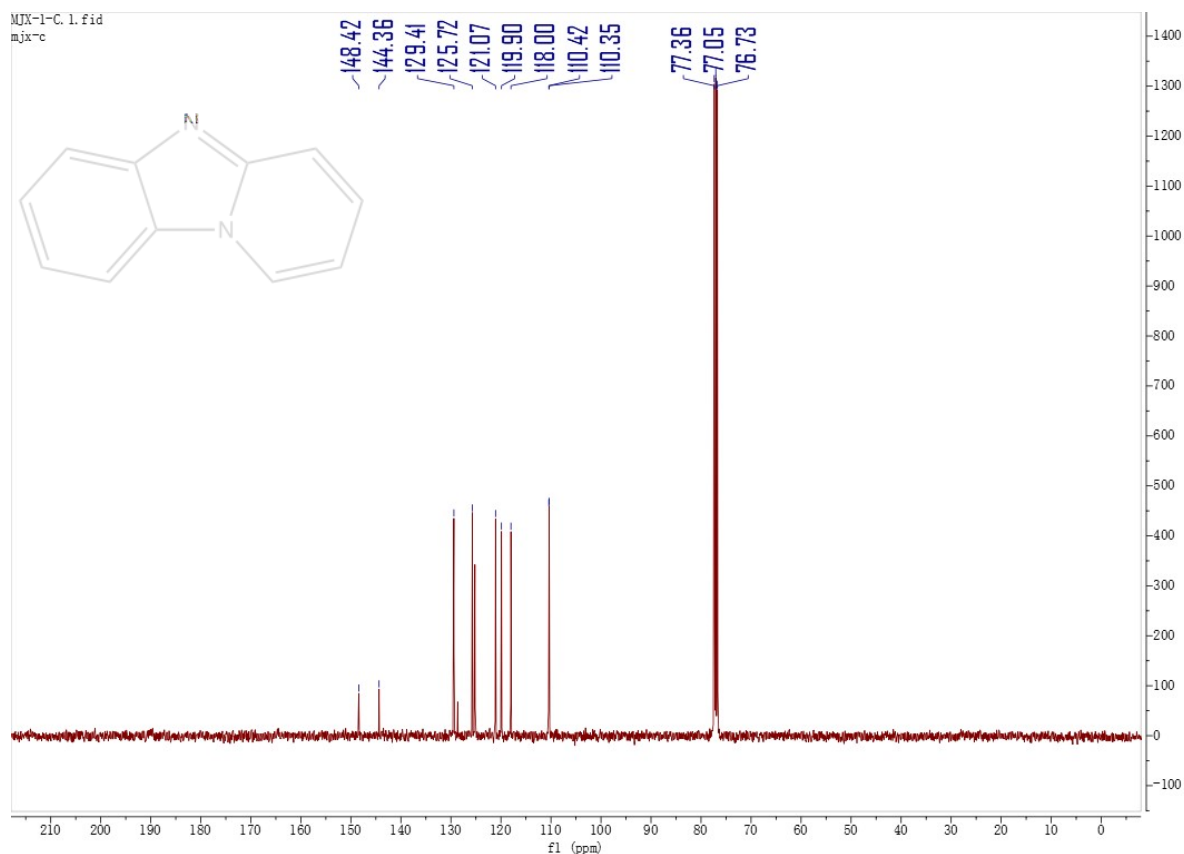

Figure S5.  $^{13}\text{C}$  NMR spectrum of BNPy in  $\text{CDCl}_3$ .

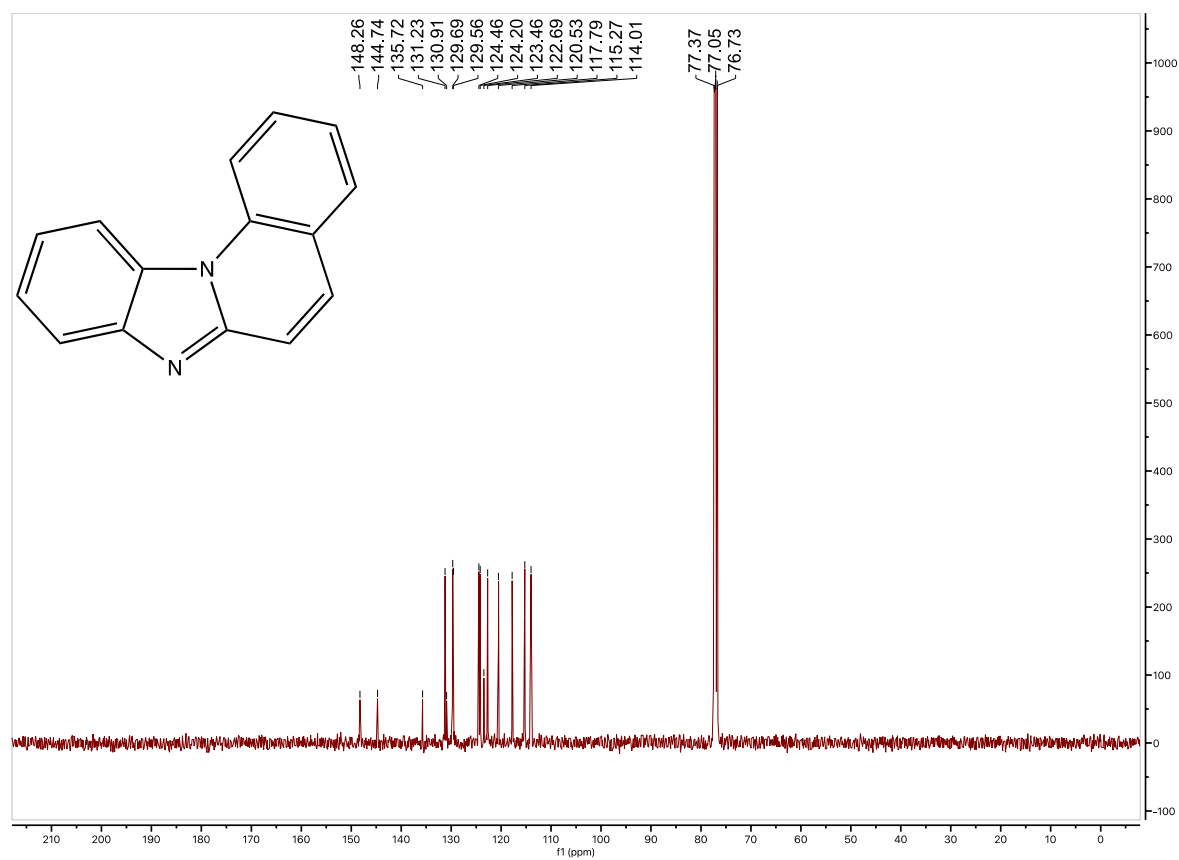

Figure S6.  $^{13}\text{C}$  NMR spectrum of BNPy-1 in  $\text{CDCl}_3$ .

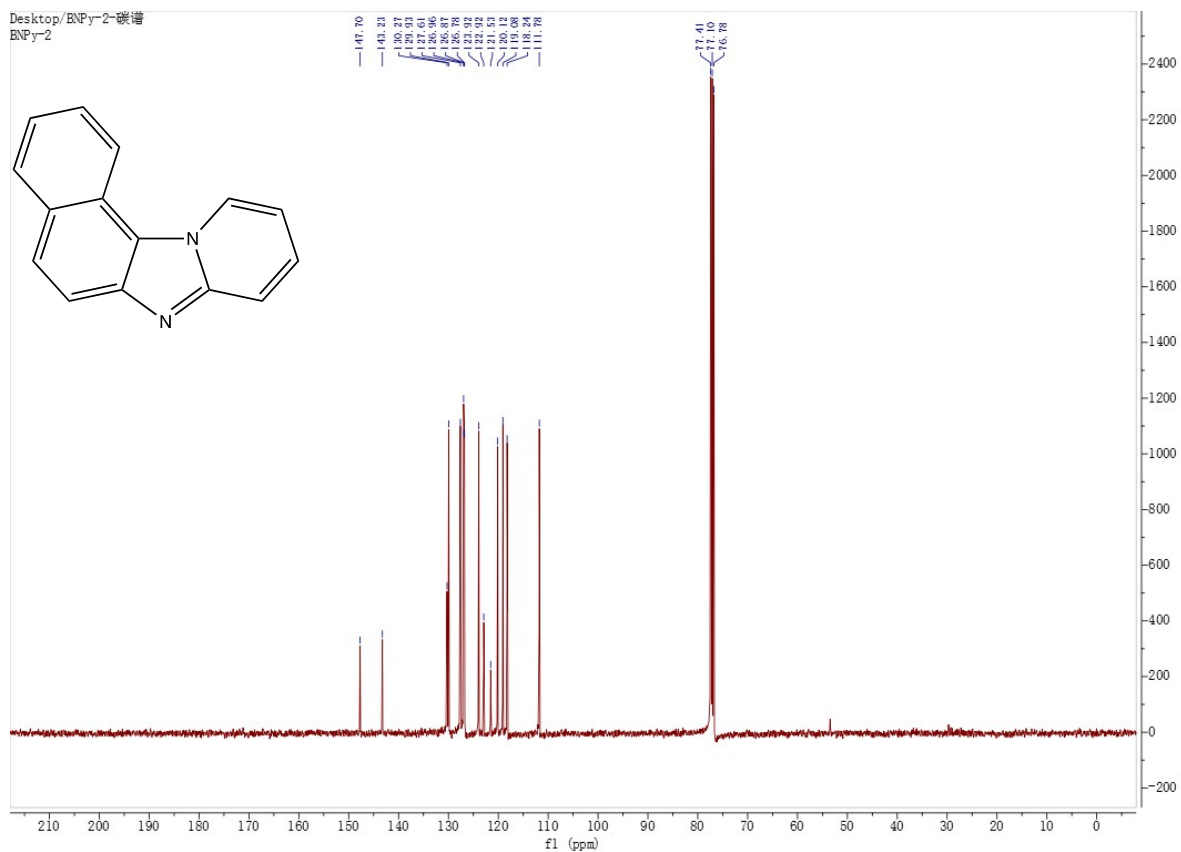

Figure S7.  $^{13}\text{C}$  NMR spectrum of BNPy-2 in  $\text{CDCl}_3$ .

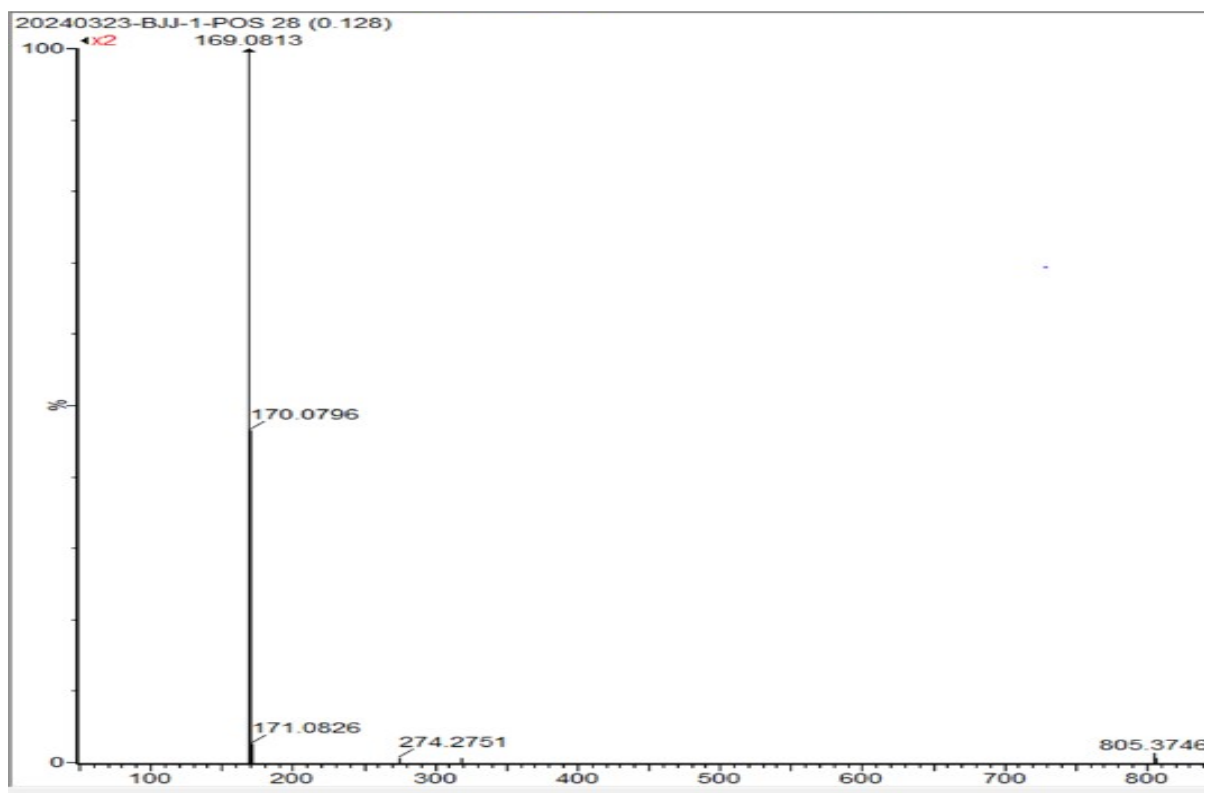

Figure S8. HR-MS spectrum of BNPy.

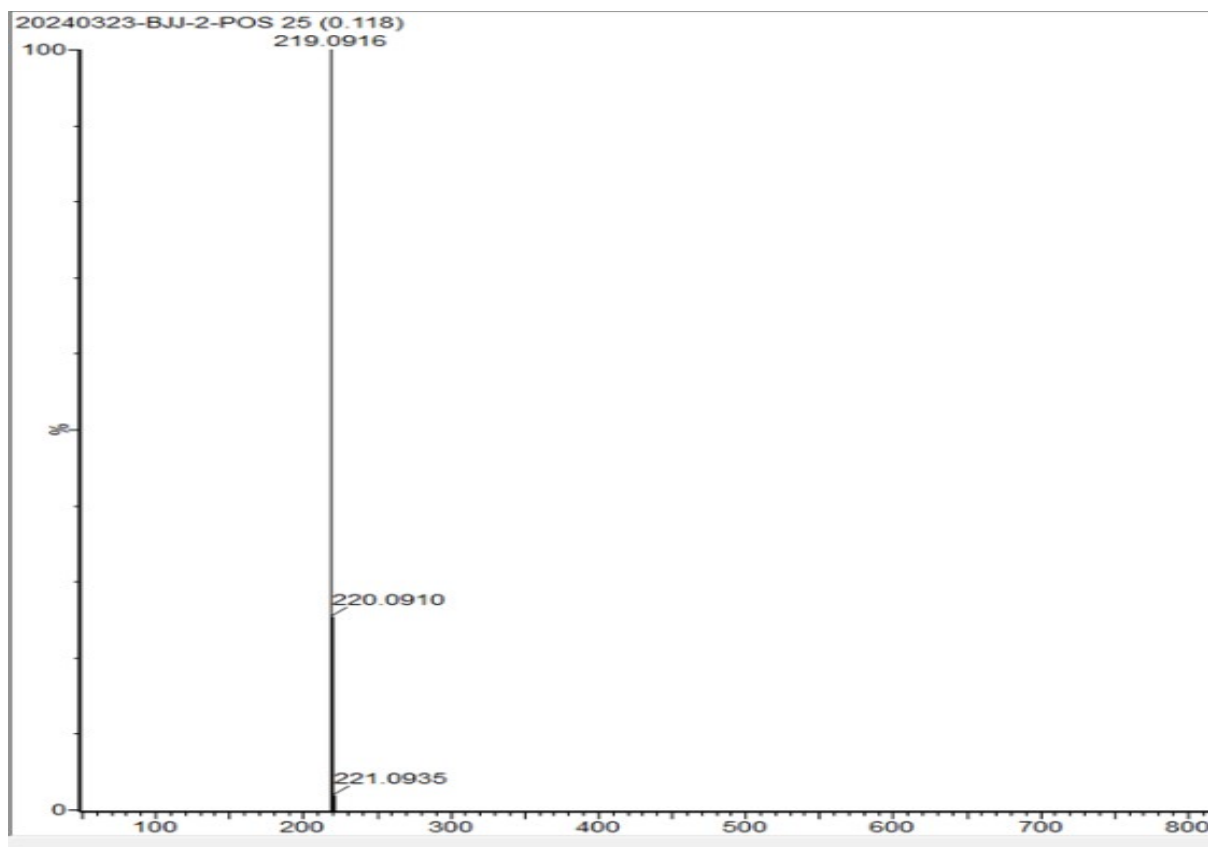

Figure S9. HR-MS spectrum of BNPY-1.

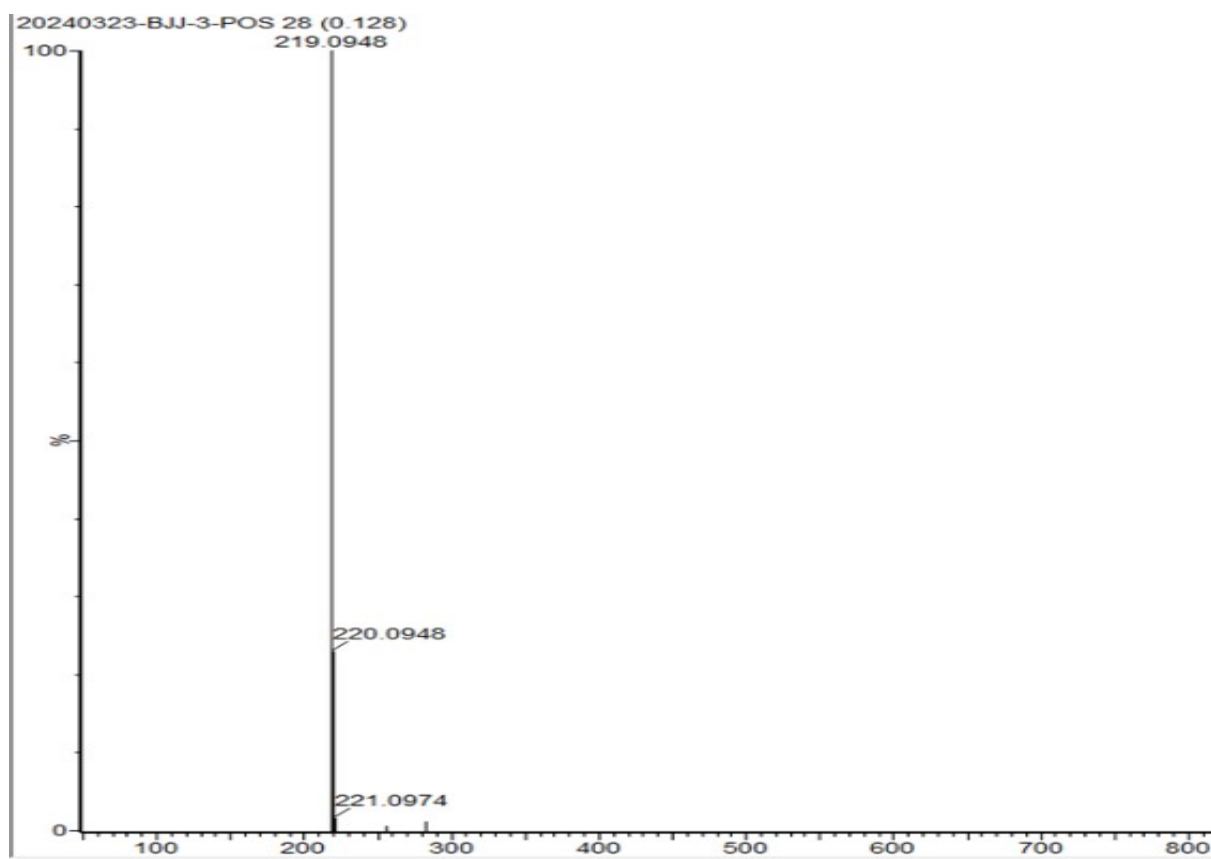

Figure S10. HR-MS spectrum of BNPY-2.

#### 4. Photophysical properties in solution

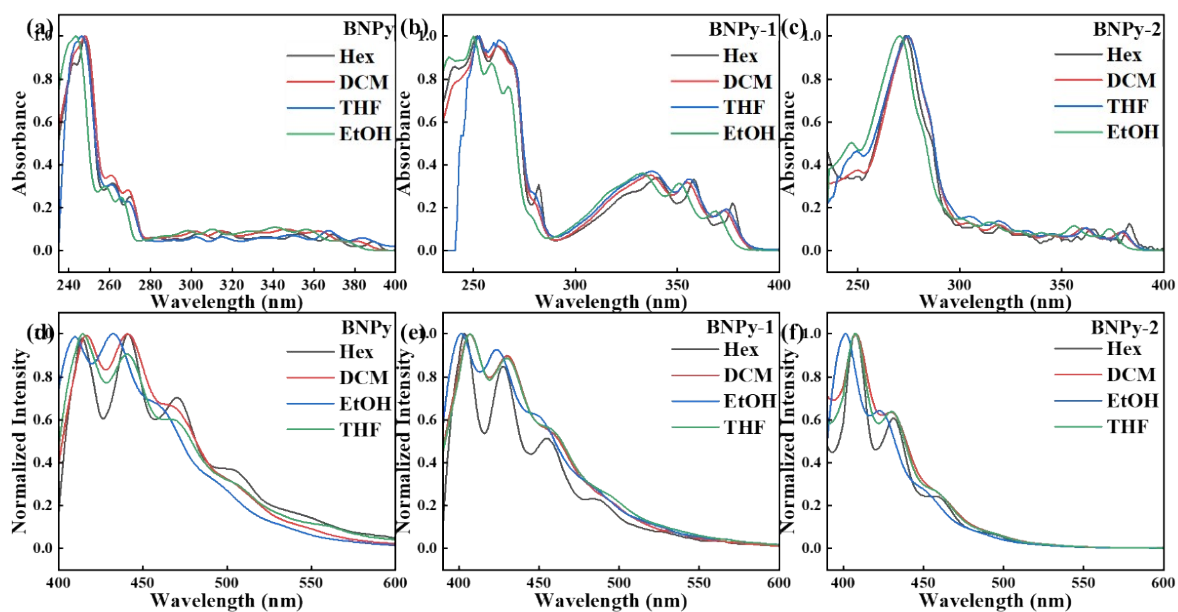

Figure S11. Absorption spectra of (a) BNPy, (b) BNPy-1 and (c) BNPy-2 in hexane, DCM, EtOH and THF solution; PL spectra of (d) BNPy, (e) BNPy-1 and (f) BNPy-2 in hexane, DCM, EtOH and THF solution.

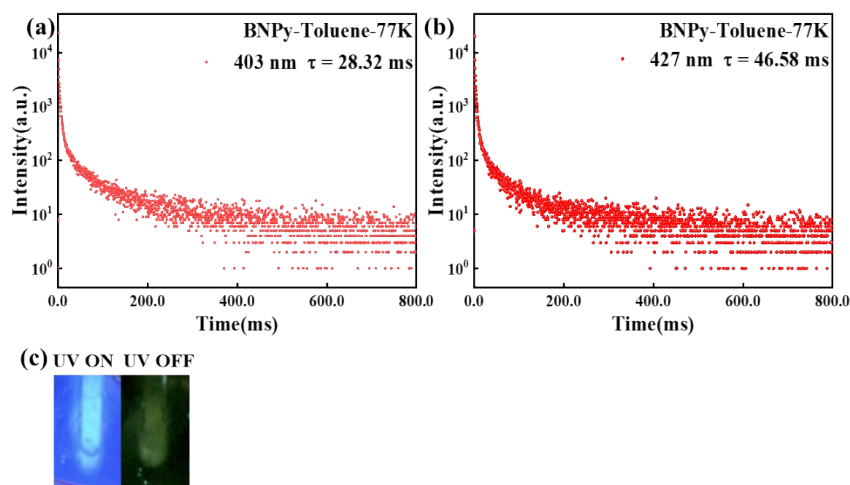

Figure S12. (a-b) Decay spectra of the BNPy toluene solution at 77 K; (c) phosphorescent images of the BNPy toluene solution in liquid nitrogen. ( $\lambda_{\text{ex}} = 365$  nm).



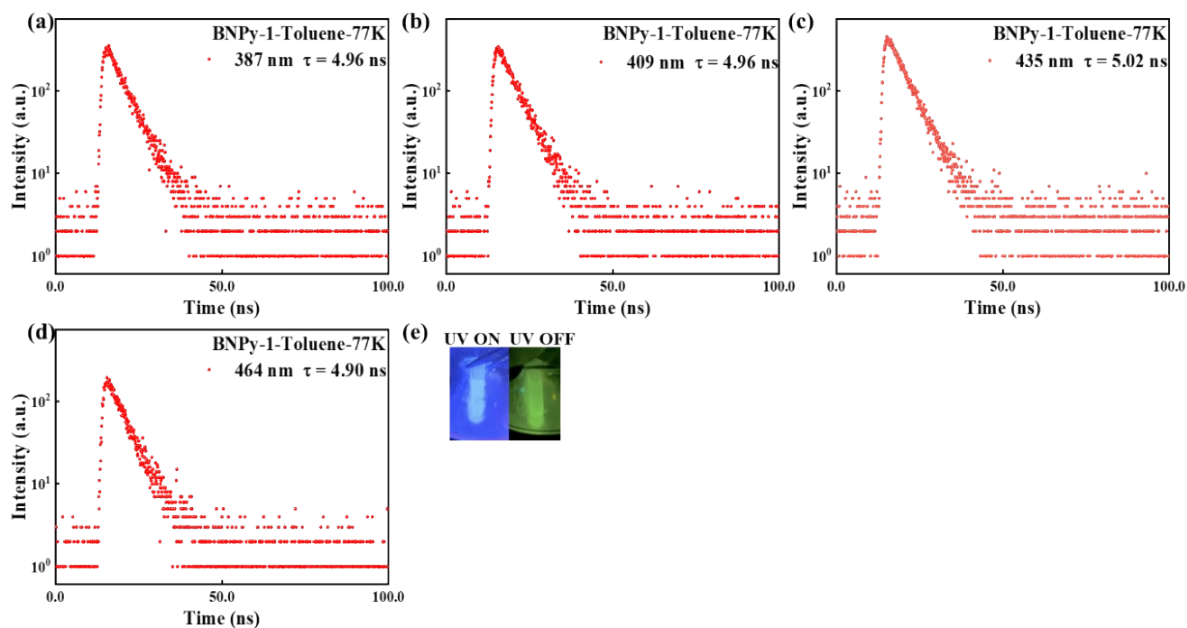

Figure S13. (a-d) Decay spectra of the BNPY-1 toluene solution at 77 K; (e) phosphorescent images of the BNPY-1 toluene solution in liquid nitrogen. ( $\lambda_{\text{ex}} = 365$  nm).

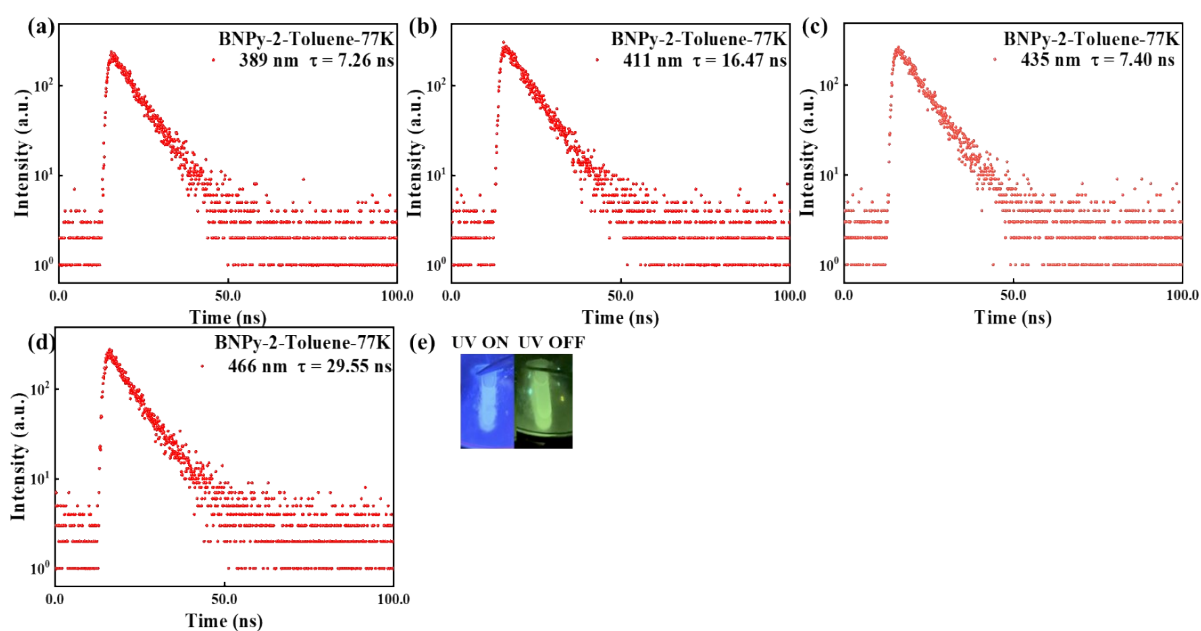

Figure S14. (a-d) Decay spectra of the BNPY-2 toluene solution at 77 K; (e) phosphorescent images of the BNPY-2 toluene solution in liquid nitrogen. ( $\lambda_{\text{ex}} = 365$  nm).

## 5. Photophysical properties in the solid state.

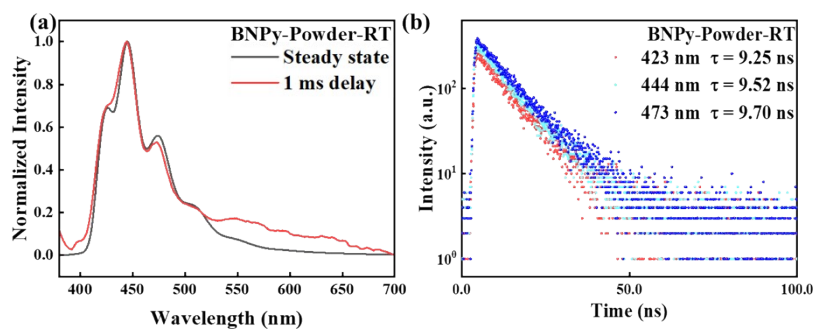

Figure S15. (a) Steady-state and 1 ms-delayed PL spectra of BNPy powder at RT; and (b) decay spectra at ambient condition.

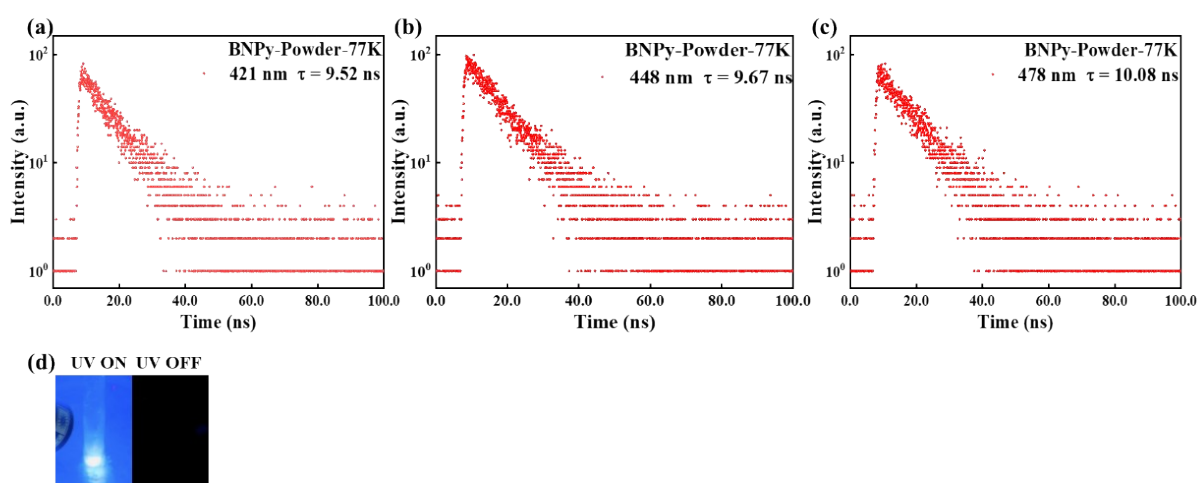

Figure S16. (a-c) Decay spectra of BNPy powder at 77K; (d) phosphorescent images of the BNPy powder in liquid nitrogen. ( $\lambda_{\text{ex}} = 365 \text{ nm}$ ).

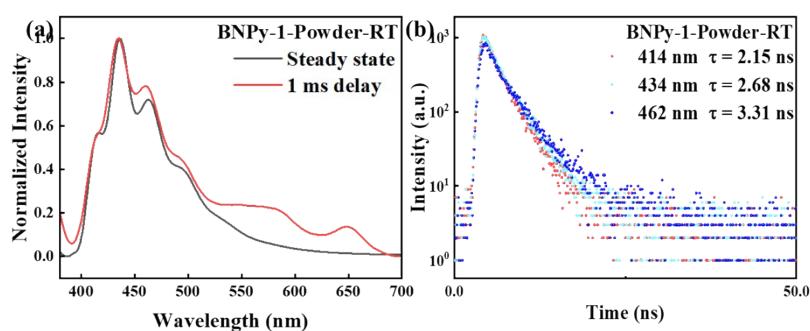

Figure S17. (a) Steady-state and 1 ms-delayed PL spectra of BNPy-1 powder at RT; and (b) decay spectra at ambient condition. ( $\lambda_{\text{ex}} = 365 \text{ nm}$ ).

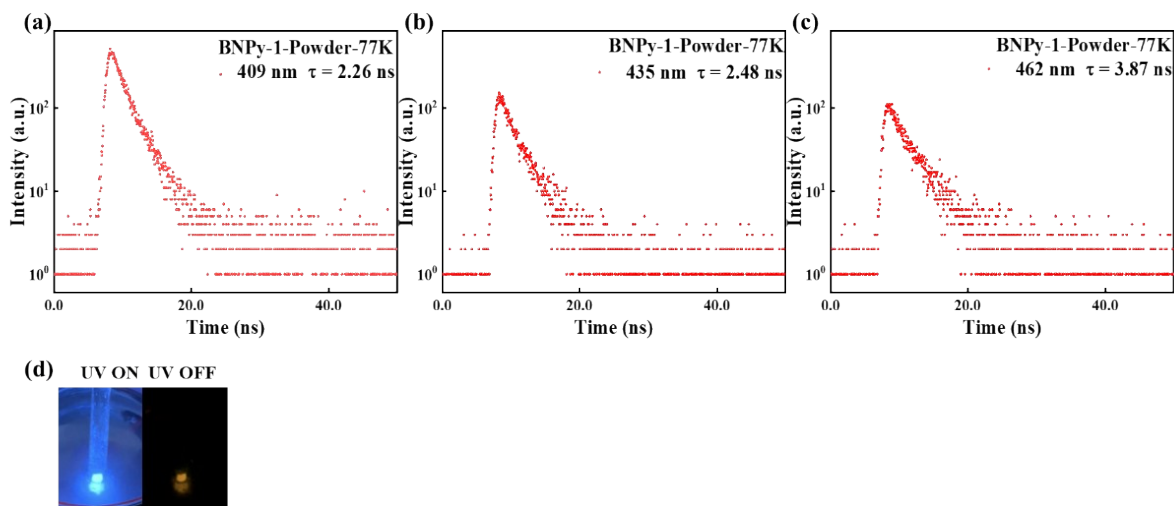

Figure S18. (a-c) Decay spectra of the BNPY-1 powder at 77 K; (d) phosphorescent images of the BNPY-1 powder in liquid nitrogen. ( $\lambda_{\text{ex}} = 365 \text{ nm}$ ).

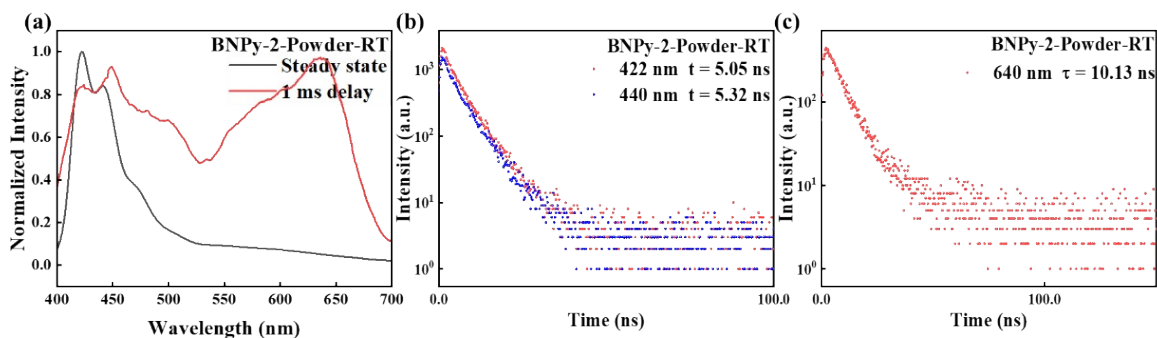

Figure S19. (a) Steady-state and 1 ms-delayed PL spectra of BNPY-2 powder at RT; and (b-c) decay spectra at ambient condition. ( $\lambda_{\text{ex}} = 365 \text{ nm}$ ).

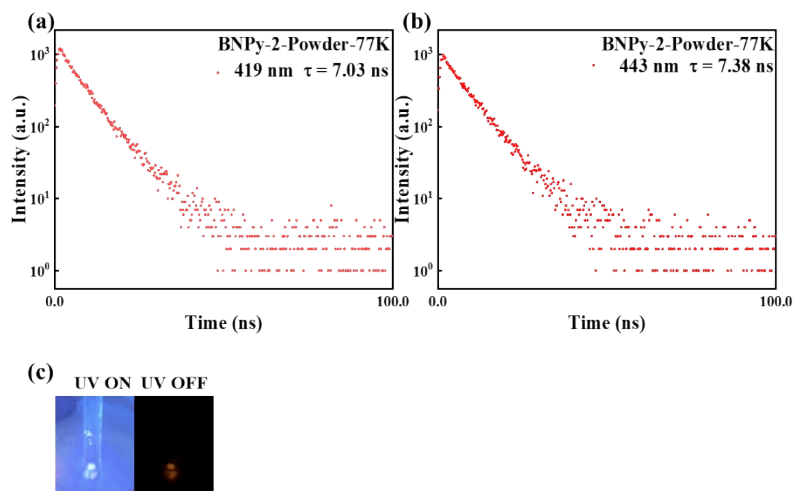

Figure S20. (a-b) Decay spectra of the BNPY-2 powder at 77 K; (d) phosphorescent images of the BNPY-2 powder in liquid nitrogen. ( $\lambda_{\text{ex}} = 365 \text{ nm}$ ).

## 6. Photophysical properties in PMMA film and PVA film.

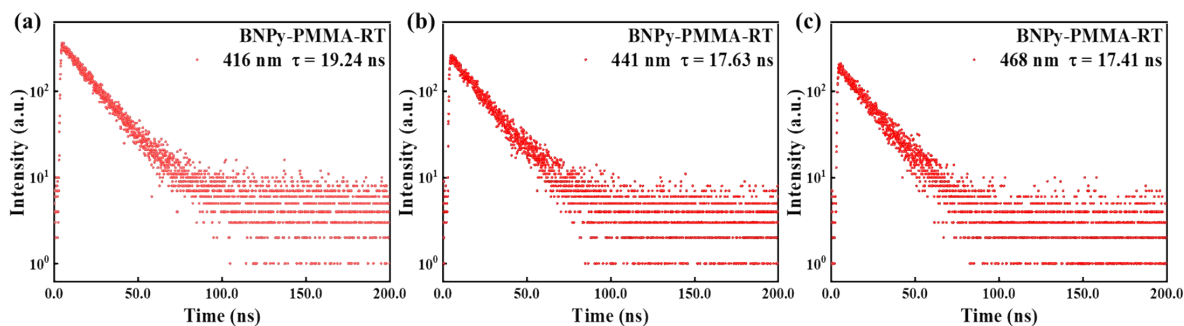

Figure S21. (a-c) Decay spectra of the BNPy@PMMA film (1 wt%) at ambient condition. ( $\lambda_{\text{ex}} = 365 \text{ nm}$ ).

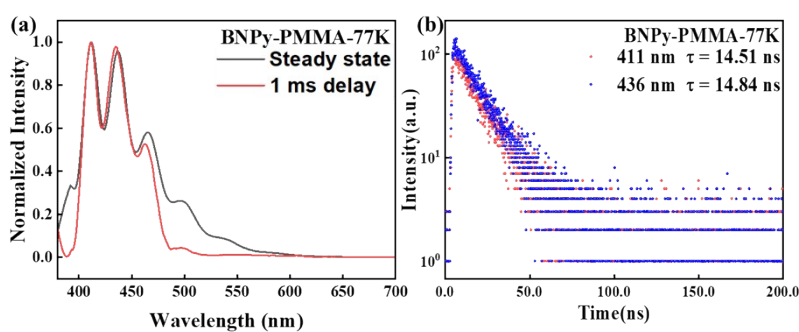

Figure S22. (a) Steady-state and 1 ms-delayed PL spectra of the BNPy@PMMA film (1 wt%); and (b) decay spectra at 77 K. ( $\lambda_{\text{ex}} = 365 \text{ nm}$ ).

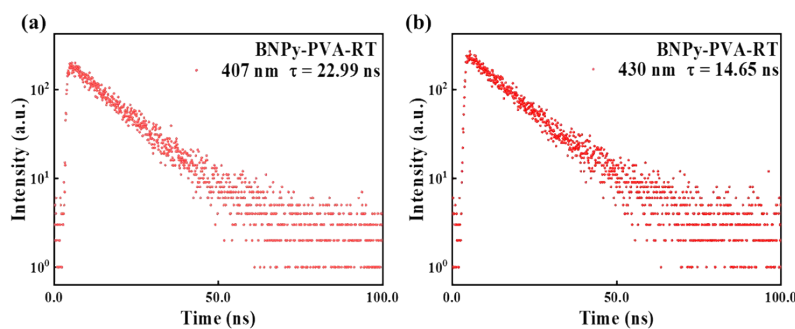

Figure S23. (a-b) Decay spectra of the BNPy@PVA film (0.1 wt%) at ambient condition. ( $\lambda_{\text{ex}} = 365 \text{ nm}$ ).

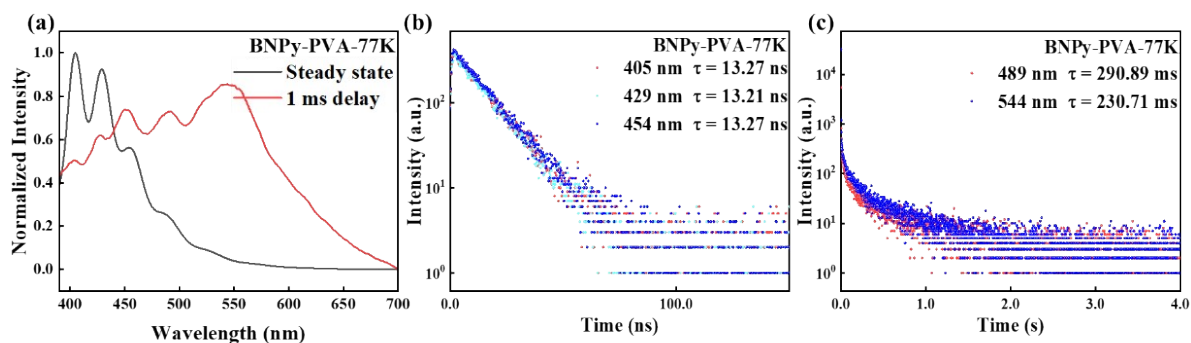

Figure S24. (a) Steady-state and 1 ms-delayed PL spectra of the BNPpy@PVA film (0.1 wt%); and (b-c) decay spectra at 77 K. ( $\lambda_{\text{ex}} = 365 \text{ nm}$ ).

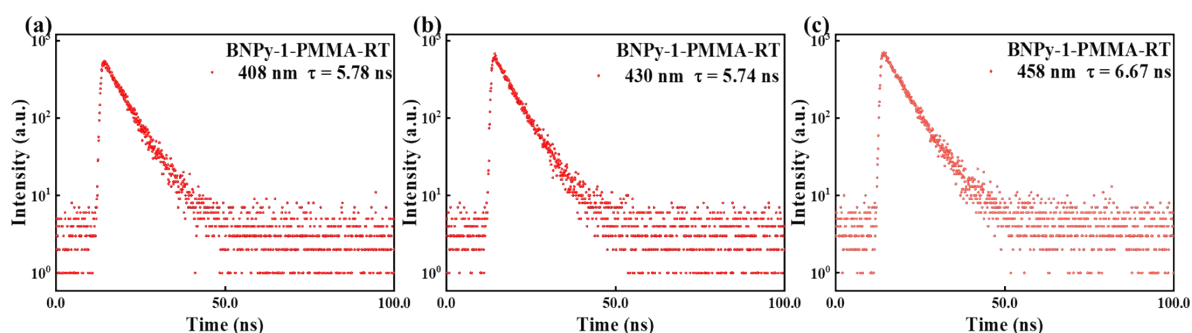

Figure S25. (a-c) Decay spectra of the BNPpy-1@PMMA film (1 wt%) at ambient condition. ( $\lambda_{\text{ex}} = 365 \text{ nm}$ ).

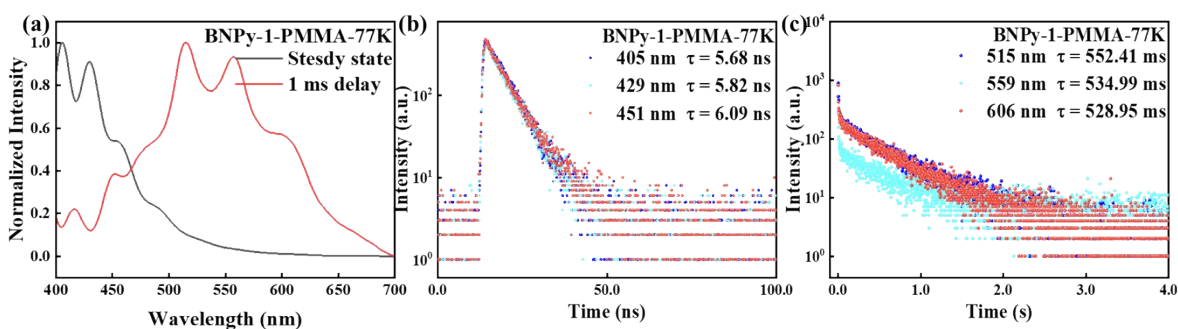

Figure S26. (a) Steady-state and 1 ms-delayed PL spectra of the BNPpy-1@PMMA film (1 wt%); and (b) decay spectra at 77 K. ( $\lambda_{\text{ex}} = 365 \text{ nm}$ ).

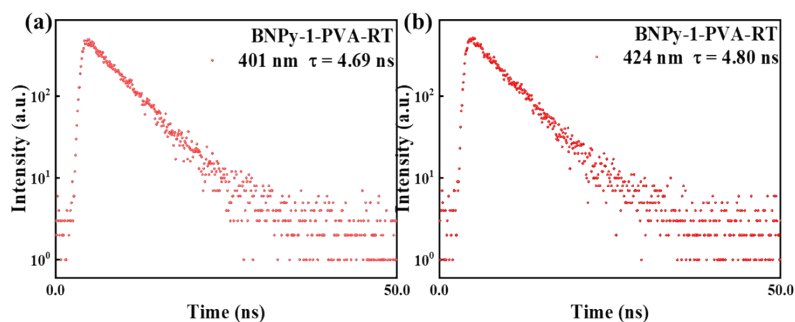

Figure S27. (a-b) Decay spectra of the BNPpy-1@PVA film (0.1 wt%) at ambient condition. ( $\lambda_{\text{ex}} = 365 \text{ nm}$ ).

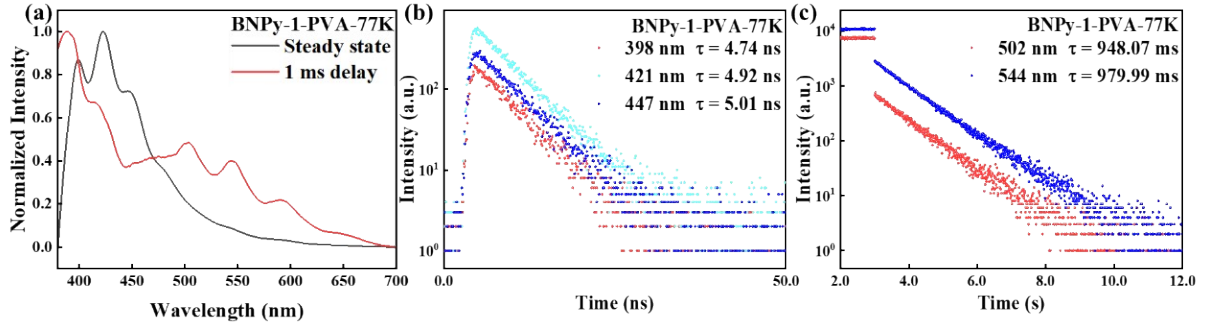

Figure S28. (a) Steady-state and 1 ms-delayed PL spectra of the BNPY-1@PVA film (0.1 wt%); and (b-c) decay spectra at 77 K. ( $\lambda_{\text{ex}} = 365$  nm).

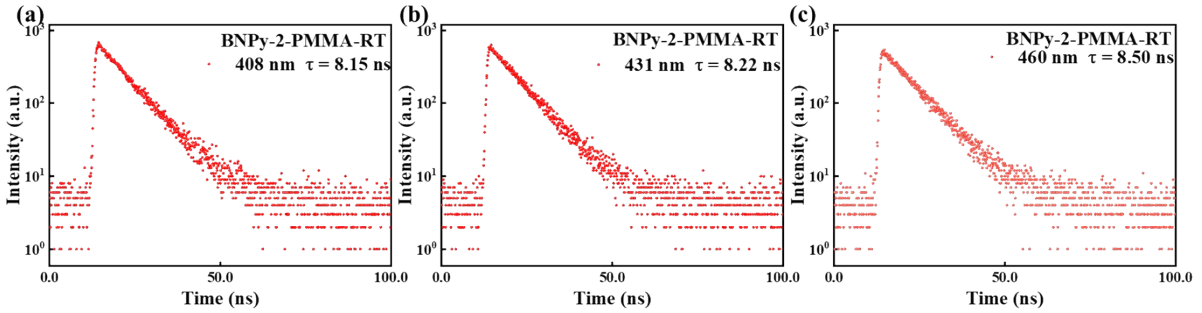

Figure S29. (a-c) Decay spectra of the BNPY-2@PMMA film (1 wt%) at ambient condition. ( $\lambda_{\text{ex}} = 365$  nm).

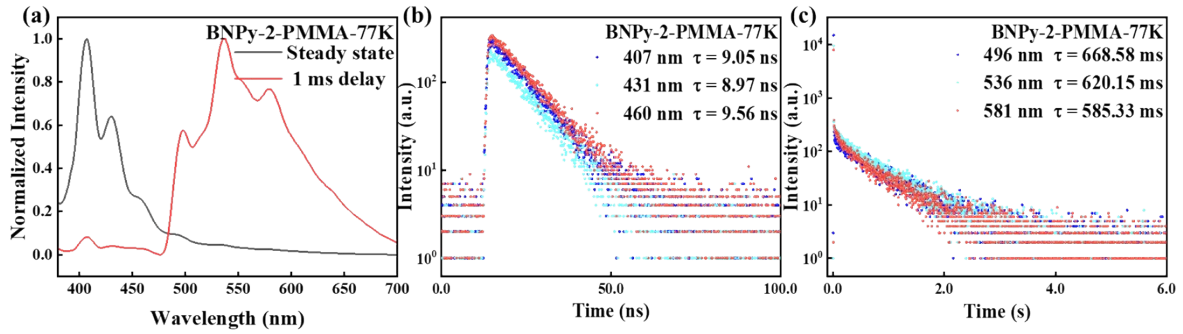

Figure S30. (a) Steady-state and 1 ms-delayed PL spectra of the BNPY-2@PMMA film (1 wt%); and (b-c) decay spectra at 77K. ( $\lambda_{\text{ex}} = 365$  nm).

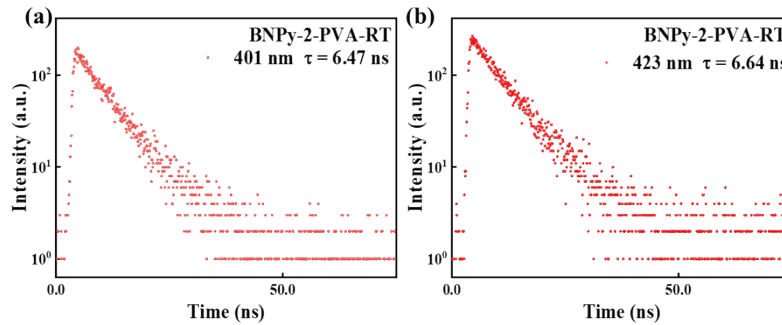

Figure S31. (a-b) Decay spectra of the BNPY-2@PVA film (0.1 wt%) at ambient condition. ( $\lambda_{\text{ex}} = 365$  nm).

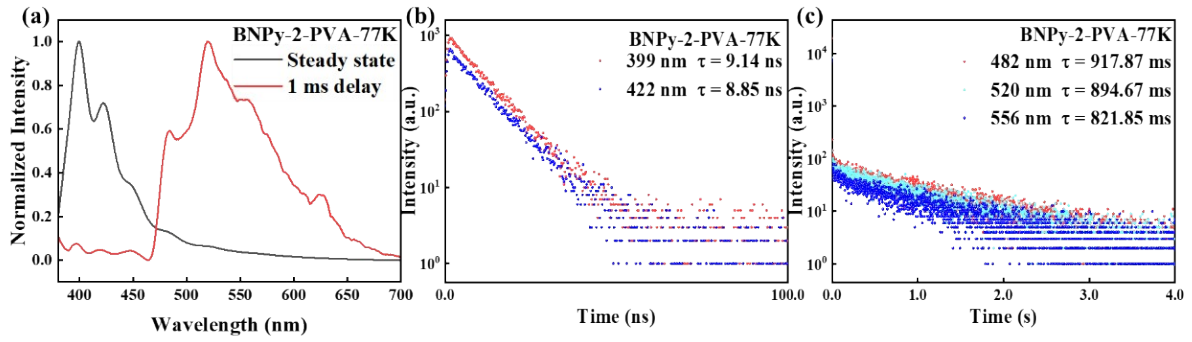

Figure S32. (a) Steady-state and 1 ms-delayed PL spectra of the BNPy-2@PVA film (0.1 wt%); and (b-c) decay spectra at 77 K. ( $\lambda_{\text{ex}} = 365$  nm).



## 7. Photophysical properties of BNPy-1/BNPy-2 doped into DMAP

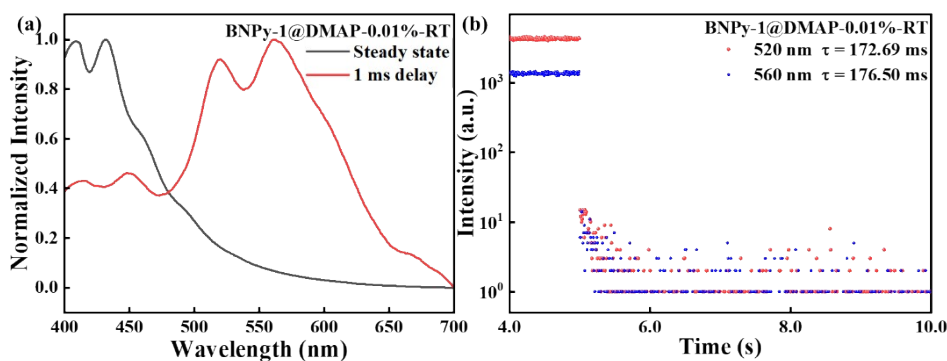

Figure S33. (a) Steady-state and 1 ms-delayed PL spectra of BNPy-1@DMAP (0.01 wt%); and (b) decay spectra at ambient condition. ( $\lambda_{\text{ex}} = 365$  nm).

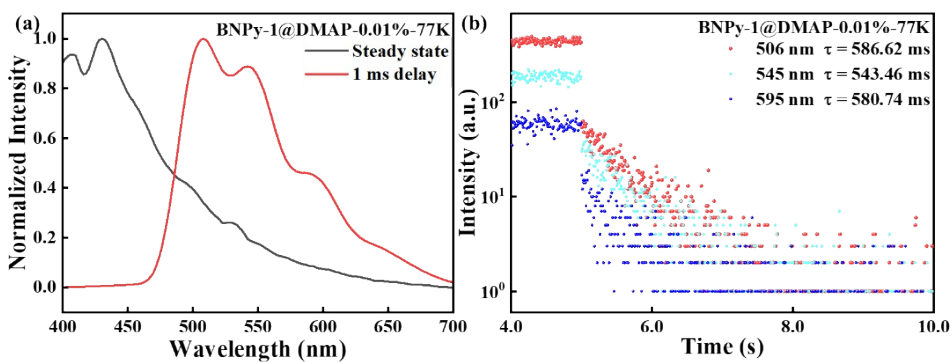

Figure S34. (a) Steady-state and 1 ms-delayed PL spectra of BNPy-1@DMAP (0.01 wt%); and (b) decay spectra at 77 K. ( $\lambda_{\text{ex}} = 365$  nm).

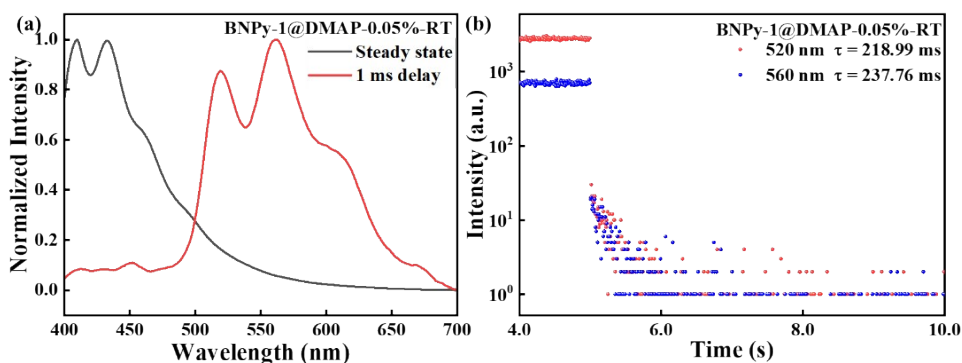

Figure S35. (a) Steady-state and 1 ms-delayed PL spectra of BNPy-1@DMAP (0.05 wt%); and (b) decay spectra at ambient condition. ( $\lambda_{\text{ex}} = 365$  nm).



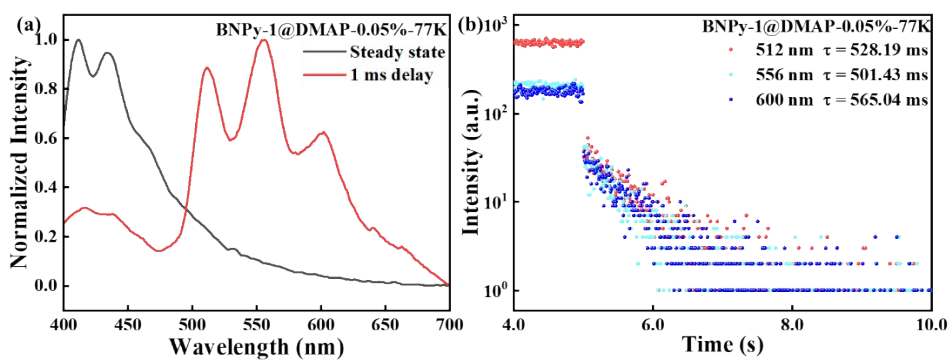

Figure S36. (a) Steady-state and 1 ms-delayed PL spectra of BNPY-1@DMAP (0.05 wt%); and (b) decay spectra at 77K. ( $\lambda_{\text{ex}} = 365$  nm).

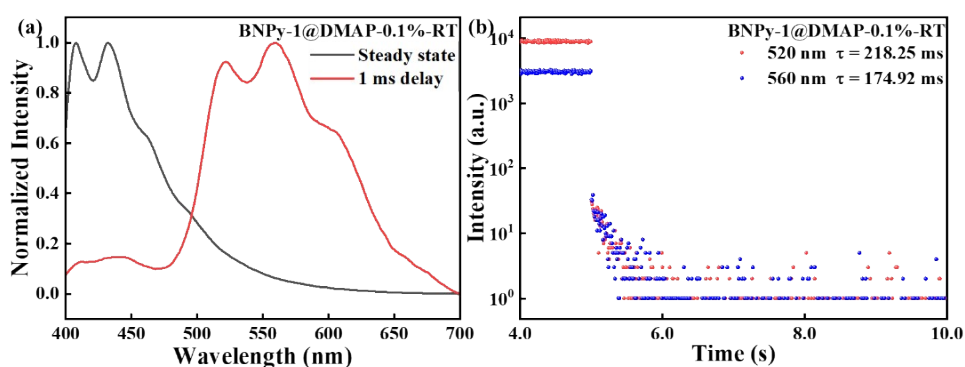

Figure S37. (a) Steady-state and 1 ms-delayed PL spectra of BNPY-1@DMAP (0.1 wt%); and (b) decay spectra at ambient condition. ( $\lambda_{\text{ex}} = 365$  nm).

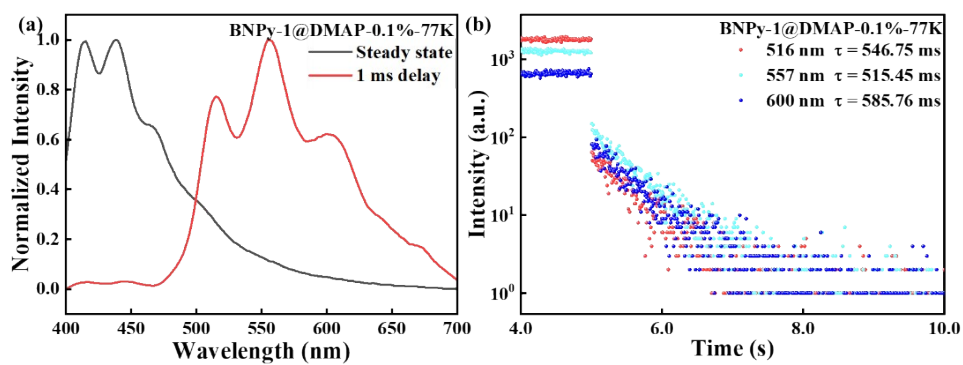

Figure S38. (a) Steady-state and 1 ms-delayed PL spectra of BNPY-1@DMAP (0.1 wt%); and (b) decay spectra at 77K. ( $\lambda_{\text{ex}} = 365$  nm).

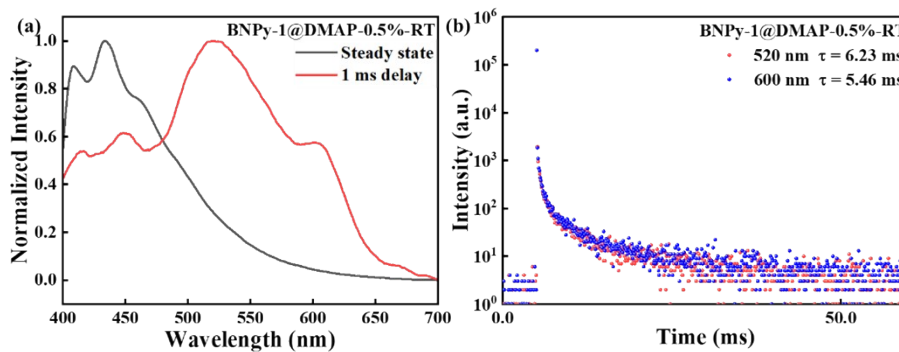

Figure S39. (a) Steady-state and 1 ms-delayed PL spectra of BNPY-1@DMAP (0.5 wt%); and (b) decay spectra at ambient condition. ( $\lambda_{\text{ex}} = 365$  nm).

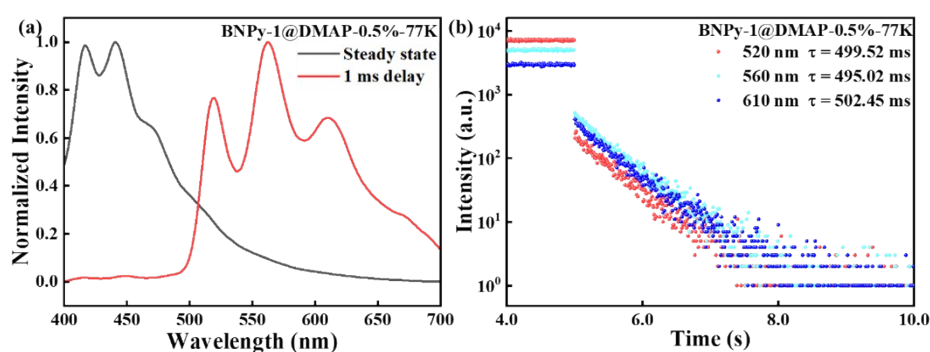

Figure S40. (a) Steady-state and 1 ms-delayed PL spectra of BNPY-1@DMAP (0.5 wt%); and (b) decay spectra at 77 K. ( $\lambda_{\text{ex}} = 365$  nm).

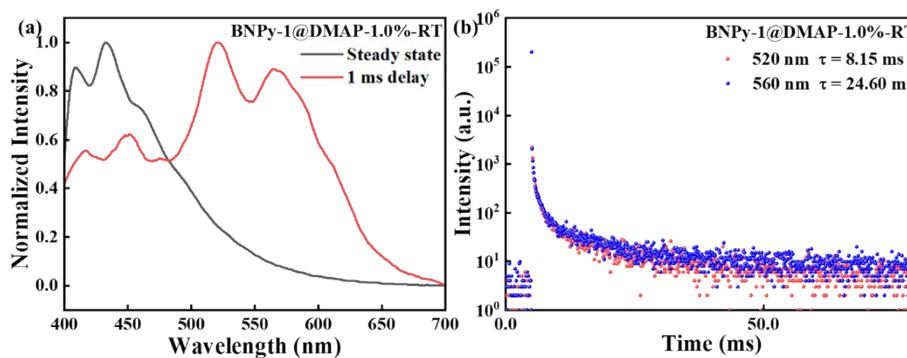

Figure S41. (a) Steady-state and 1 ms-delayed PL spectra of BNPY-1@DMAP (1.0 wt%); and (b) decay spectra at ambient condition. ( $\lambda_{\text{ex}} = 365$  nm).

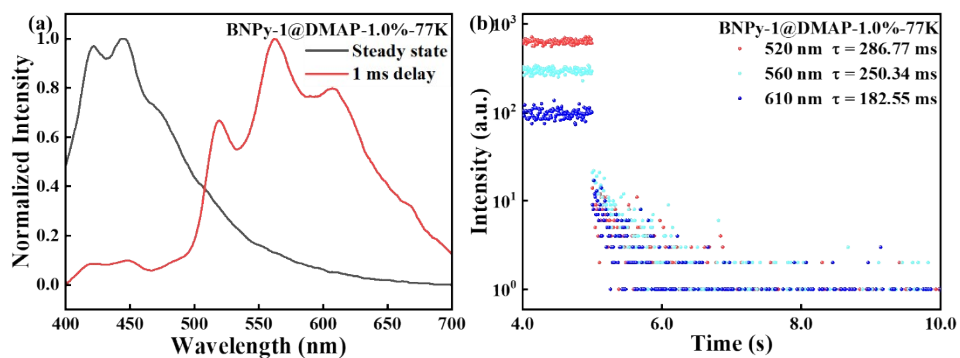

Figure S42. (a) Steady-state and 1 ms-delayed PL spectra of BNPY-1@DMAP (1.0 wt%); and (b) decay spectra at 77 K. ( $\lambda_{\text{ex}} = 365$  nm).

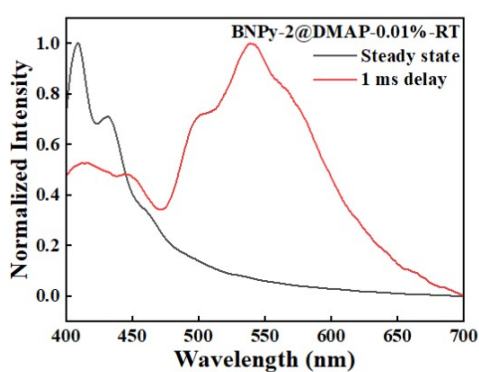

Figure S43. Steady-state and 1 ms-delayed PL spectra of BNPY-2@DMAP (0.01 wt%) at ambient condition. ( $\lambda_{\text{ex}} = 365$  nm).

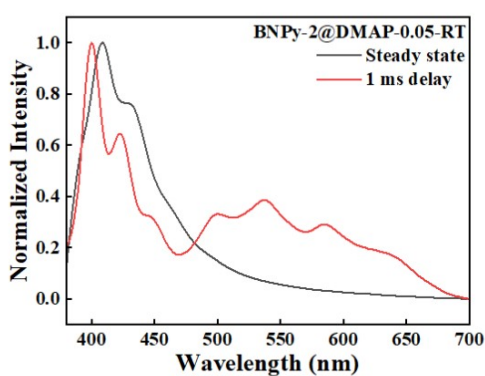

Figure S44. Steady-state and 1 ms-delayed PL spectra of BNPY-2@DMAP (0.05 wt%) at ambient condition. ( $\lambda_{\text{ex}} = 365$  nm).

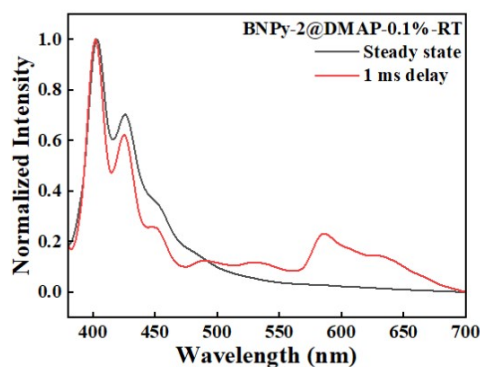

Figure S45. Steady-state and 1 ms-delayed PL spectra of BNPY-2@DMAP (0.1 wt%) at ambient condition. ( $\lambda_{\text{ex}} = 365$  nm).

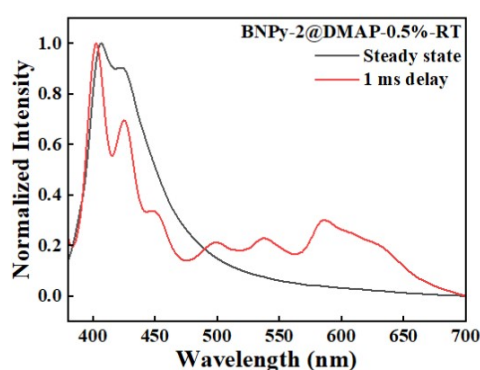

Figure S46. Steady-state and 1 ms-delayed PL spectra of BNPY-2@DMAP (0.5 wt%) at ambient condition. ( $\lambda_{\text{ex}} = 365$  nm).

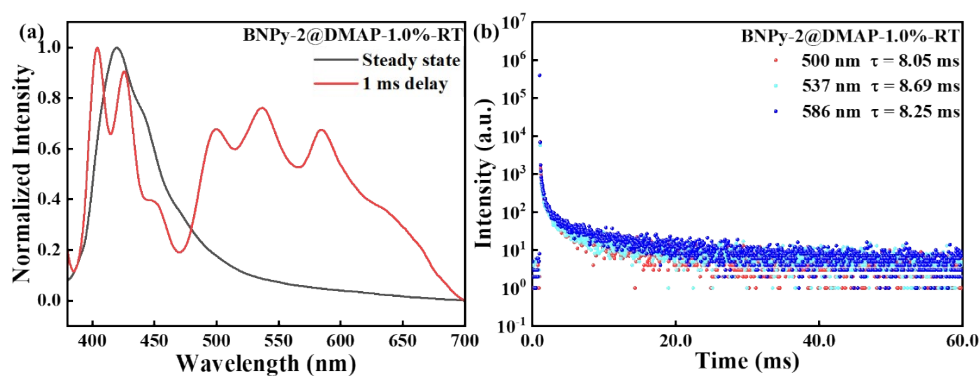

Figure S47. (a) Steady-state and 1 ms-delayed PL spectra of BNPY-2@DMAP (1.0 wt%); and (b) decay spectra at ambient condition. ( $\lambda_{\text{ex}} = 365$  nm).

## 8. Photophysical properties in the AA/MA copolymerized film

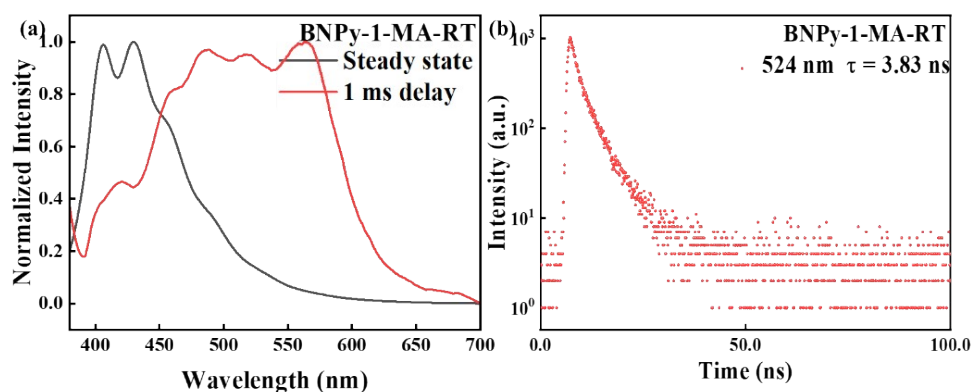

Figure S48. (a) Steady-state and 1 ms-delayed PL spectra of BNPY-1@0PAA-PMA film (0.1 wt%); and (b) decay spectra at ambient condition. ( $\lambda_{\text{ex}} = 365$  nm).

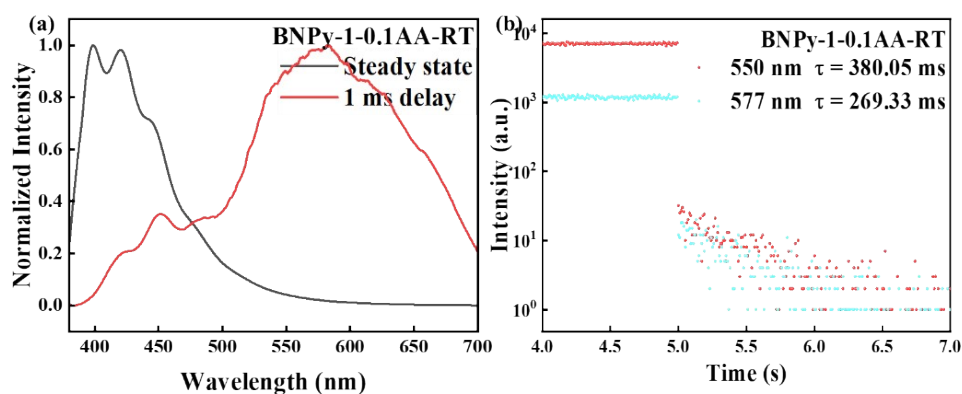

Figure S49. (a) Steady-state and 1 ms-delayed PL spectra of BNPY-1@0.1PAA-PMA film (0.1 wt%); and (b) decay spectra at ambient condition. ( $\lambda_{\text{ex}} = 365$  nm).

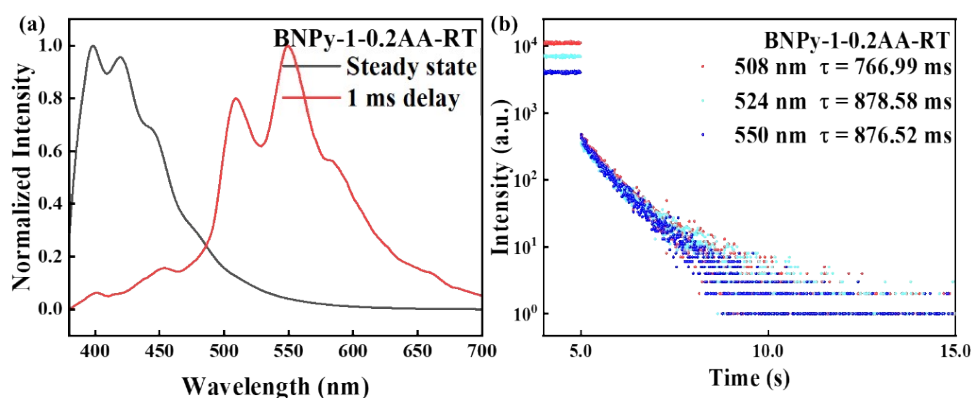

Figure S50. (a) Steady-state and 1 ms-delayed PL spectra of BNPY-1@0.2PAA-PMA film (0.1 wt%); and (b) decay spectra at ambient condition. ( $\lambda_{\text{ex}} = 365$  nm).

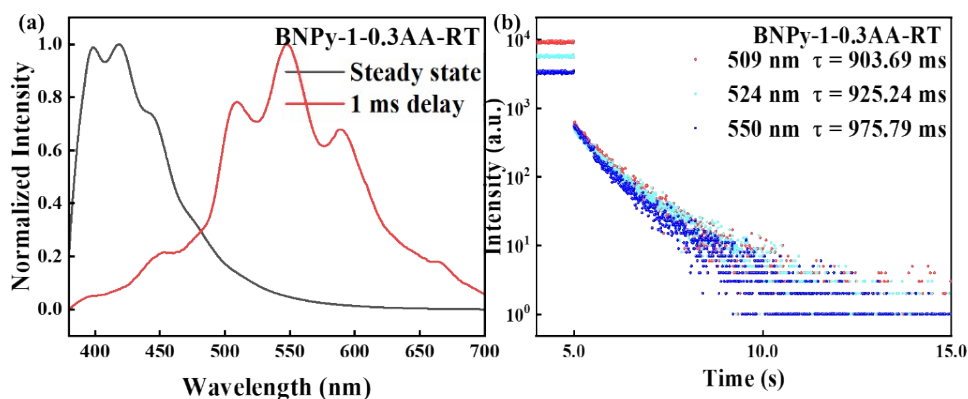

Figure S51. (a) Steady-state and 1 ms-delayed PL spectra of BNPY-1@0.3PAA-PMA film (0.1 wt%); and (b) decay spectra at ambient condition. ( $\lambda_{\text{ex}} = 365$  nm).

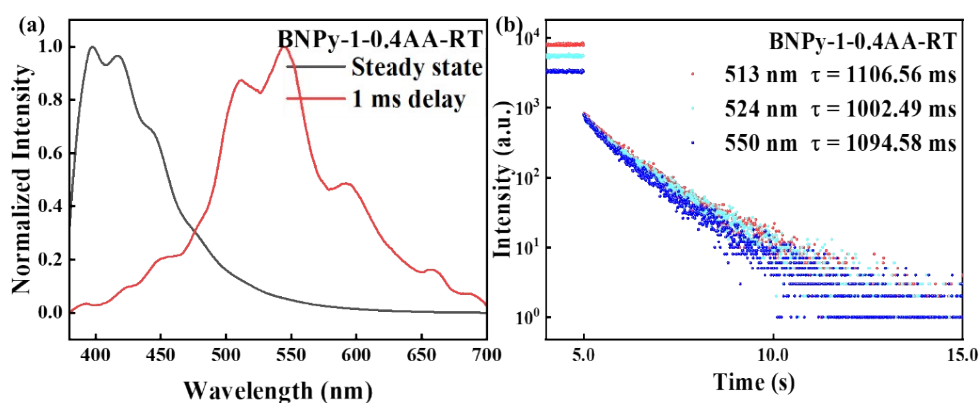

Figure S52. (a) Steady-state and 1 ms-delayed PL spectra of BNPY-1@0.4PAA-PMA film (0.1 wt%); and (b) decay spectra at ambient condition. ( $\lambda_{\text{ex}} = 365$  nm).

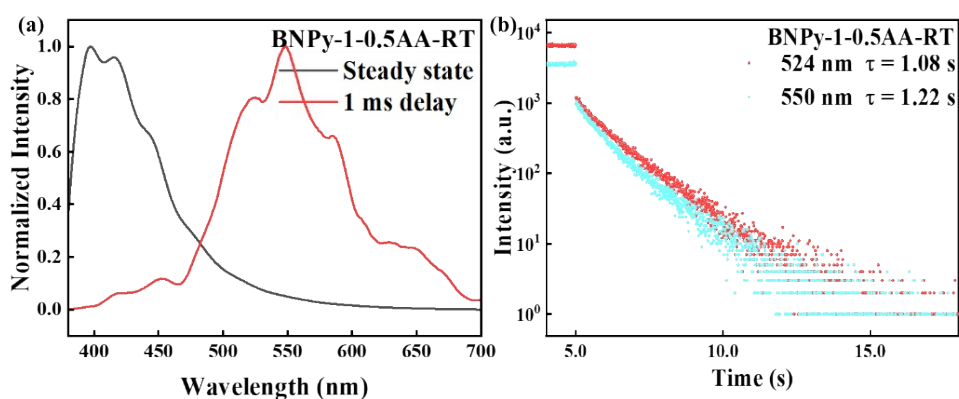

Figure S53. (a) Steady-state and 1 ms-delayed PL spectra of BNPY-1@0.5PAA-PMA film (0.1 wt%); and (b) decay spectra at ambient condition. ( $\lambda_{\text{ex}} = 365$  nm).

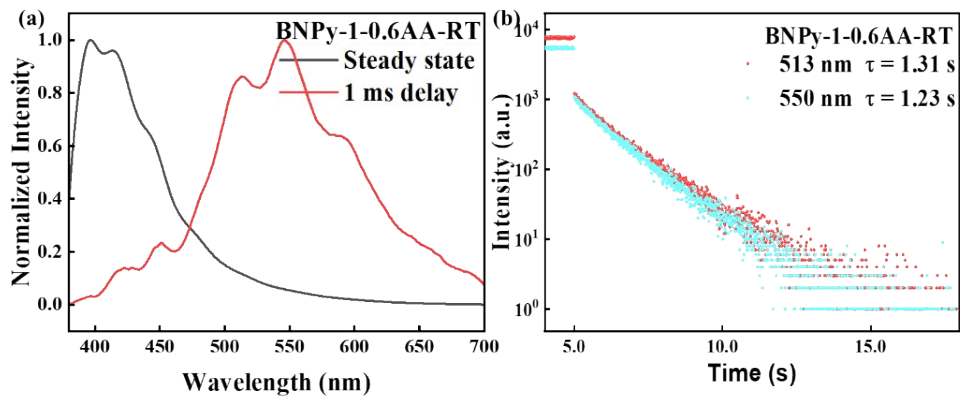

Figure S54. (a) Steady-state and 1 ms-delayed PL spectra of BNPpy-1@0.6PAA-PMA film (0.1 wt%); and (b) decay spectra at ambient condition. ( $\lambda_{\text{ex}} = 365 \text{ nm}$ ).

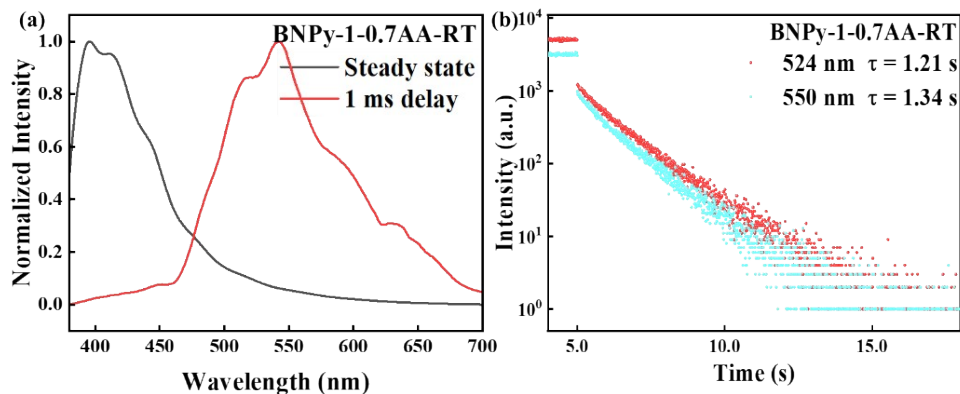

Figure S55. (a) Steady-state and 1 ms-delayed PL spectra of BNPpy-1@0.7PAA-PMA film (0.1 wt%); and (b) decay spectra at ambient condition. ( $\lambda_{\text{ex}} = 365 \text{ nm}$ ).

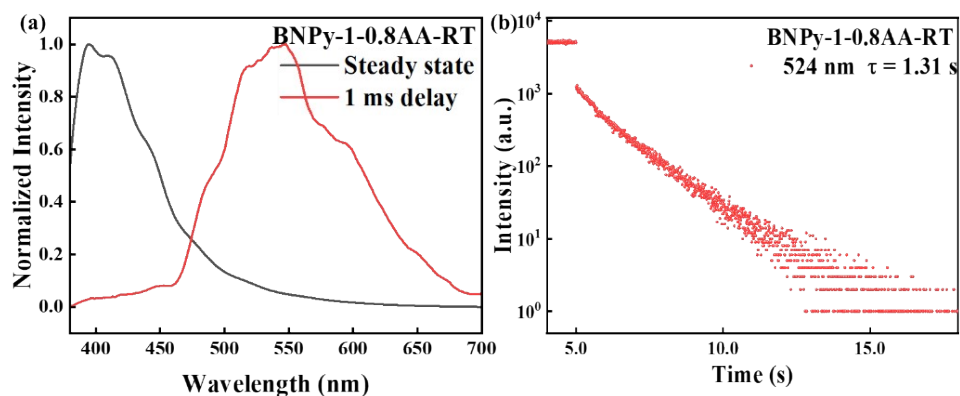

Figure S56. (a) Steady-state and 1 ms-delayed PL spectra of BNPpy-1@0.8PAA-PMA film (0.1 wt%); and (b) decay spectra at ambient condition. ( $\lambda_{\text{ex}} = 365 \text{ nm}$ ).

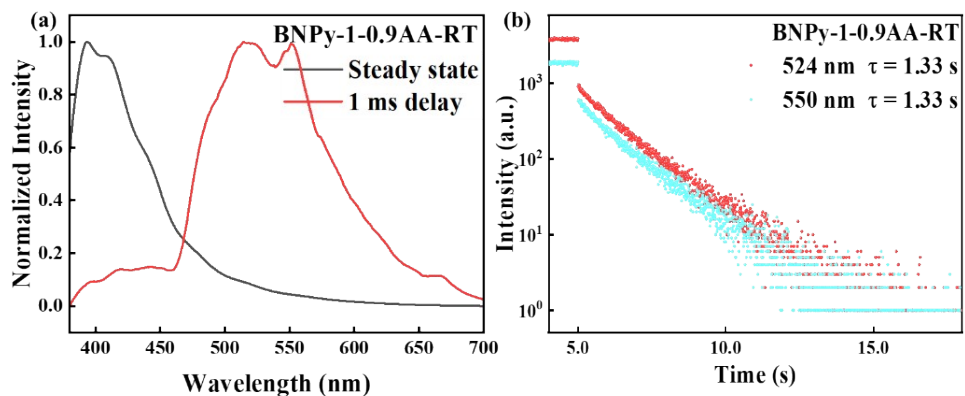

Figure S57. (a) Steady-state and 1 ms-delayed PL spectra of BNPY-1@0.9PAA-PMA film (0.1 wt%); and (b) decay spectra at ambient condition. ( $\lambda_{\text{ex}} = 365 \text{ nm}$ ).

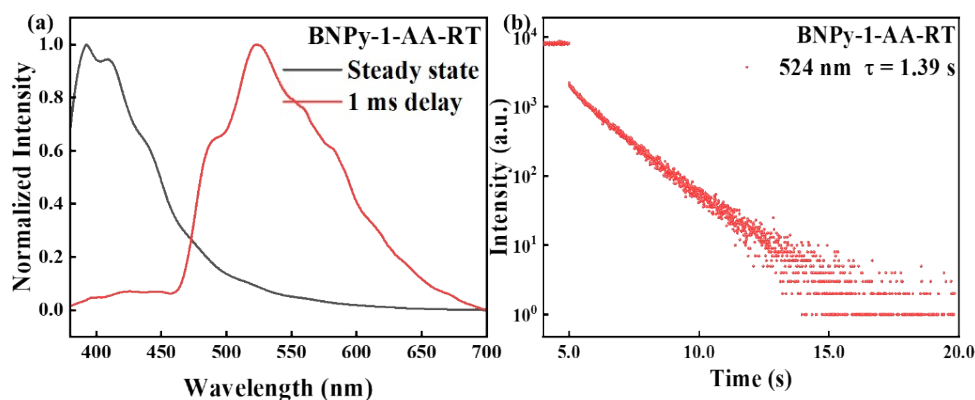

Figure S58. (a) Steady-state and 1 ms-delayed PL spectra of BNPY-1@1.0PAA-PMA film (0.1 wt%); and (b) decay spectra at ambient condition. ( $\lambda_{\text{ex}} = 365 \text{ nm}$ ).



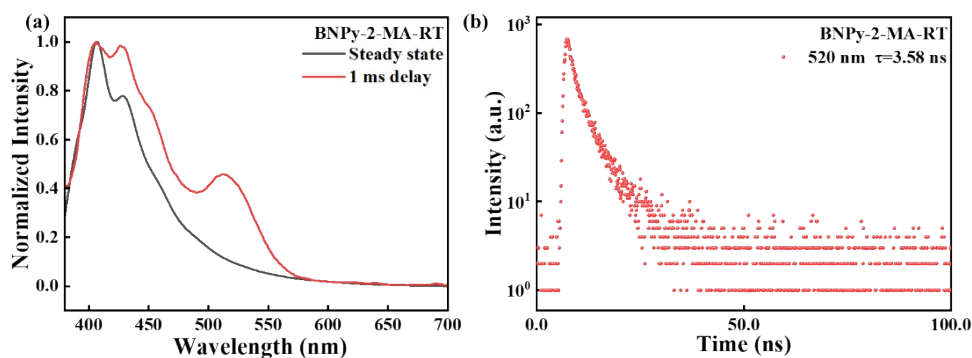

Figure S59. (a) Steady-state and 1 ms-delayed PL spectra of BNPY-2@0PAA-PMA film (0.1 wt%); and (b) decay spectra at ambient condition. ( $\lambda_{\text{ex}} = 365$  nm).

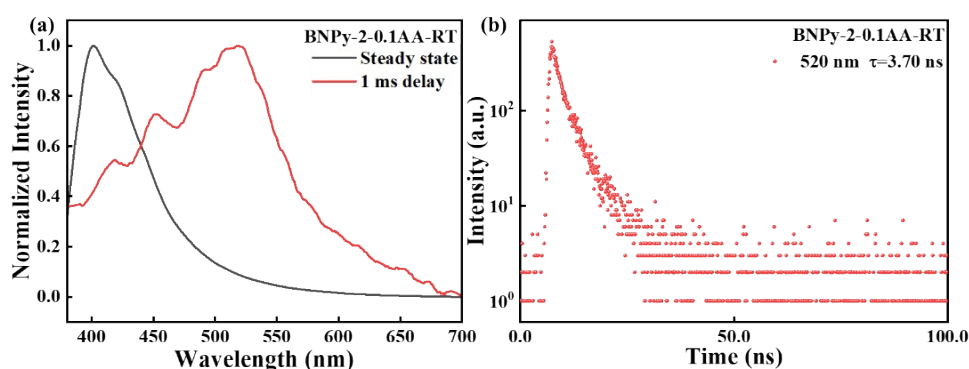

Figure S60. (a) Steady-state and 1 ms-delayed PL spectra of BNPY-2@0.1PAA-PMA film (0.1 wt%); and (b) decay spectra at ambient condition. ( $\lambda_{\text{ex}} = 365$  nm).

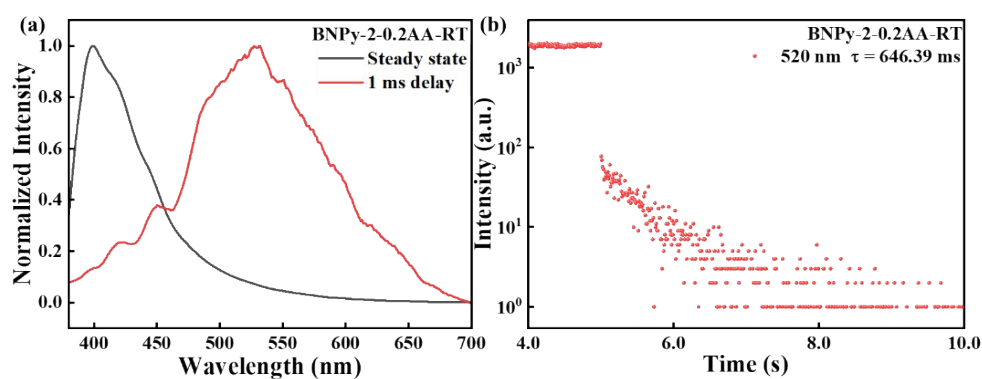

Figure S61. (a) Steady-state and 1 ms-delayed PL spectra of BNPY-2@0.2PAA-PMA film (0.1 wt%); and (b) decay spectra at ambient condition. ( $\lambda_{\text{ex}} = 365$  nm).

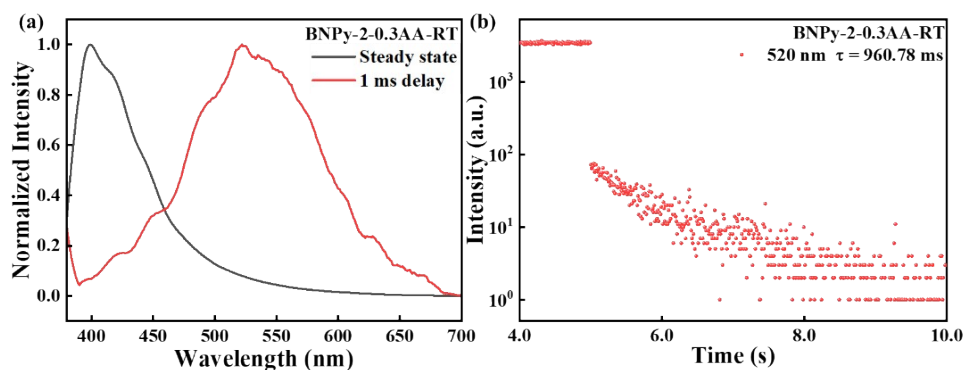

Figure S62. (a) Steady-state and 1 ms-delayed PL spectra of BNPY-2@0.3PAA-PMA film (0.1 wt%); and (b) decay spectra at ambient condition. ( $\lambda_{\text{ex}} = 365 \text{ nm}$ ).

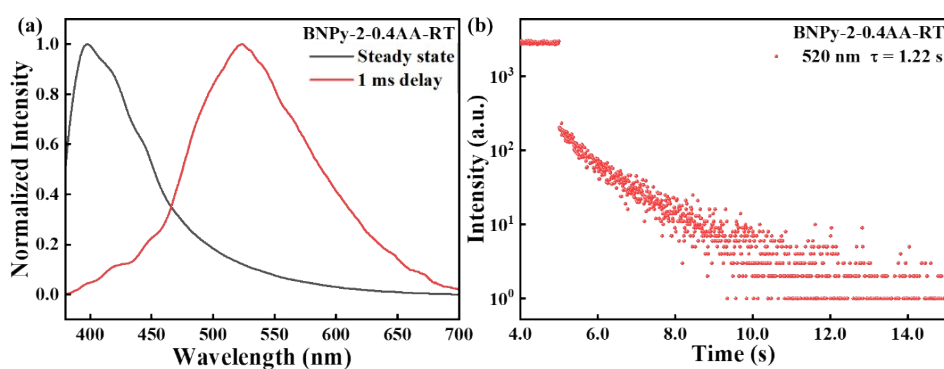

Figure S63. (a) Steady-state and 1 ms-delayed PL spectra of BNPY-2@0.4PAA-PMA film (0.1 wt%); and (b) decay spectra at ambient condition. ( $\lambda_{\text{ex}} = 365 \text{ nm}$ ).

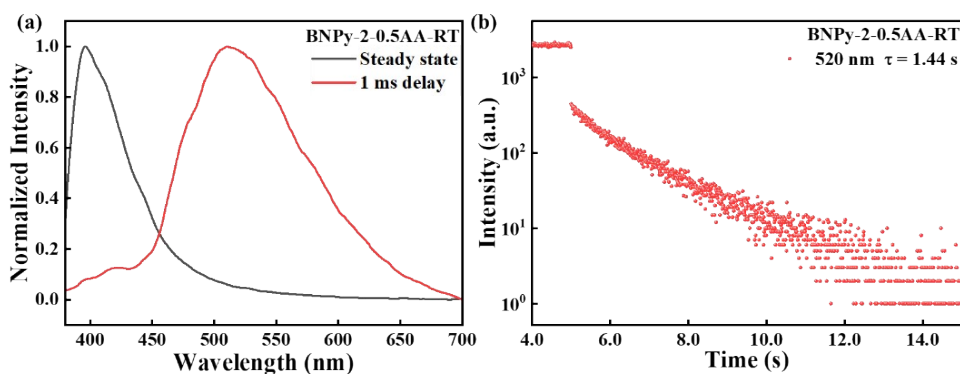

Figure S64. (a) Steady-state and 1 ms-delayed PL spectra of BNPY-2@0.5PAA-PMA film (0.1 wt%); and (b) decay spectra at ambient condition. ( $\lambda_{\text{ex}} = 365 \text{ nm}$ ).

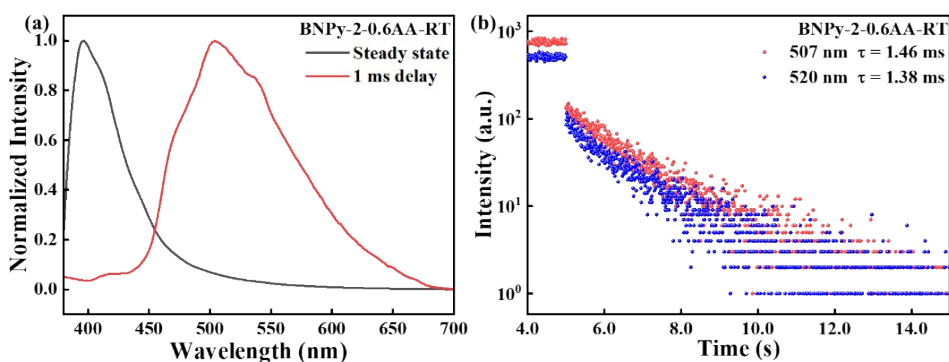

Figure S65. (a) Steady-state and 1 ms-delayed PL spectra of BNPy-2@0.6PAA-PMA film (0.1 wt%); and (b) decay spectra at ambient condition. ( $\lambda_{\text{ex}} = 365$  nm).

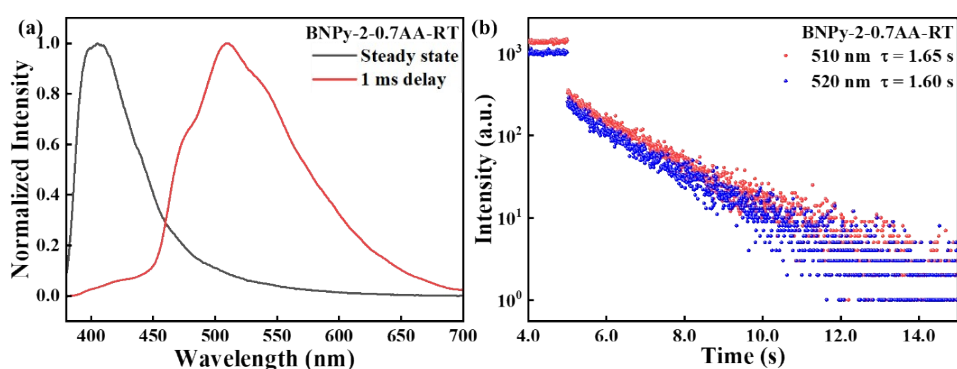

Figure S66. (a) Steady-state and 1 ms-delayed PL spectra of BNPy-2@0.7PAA-PMA film (0.1 wt%); and (b) decay spectra at ambient condition. ( $\lambda_{\text{ex}} = 365$  nm).

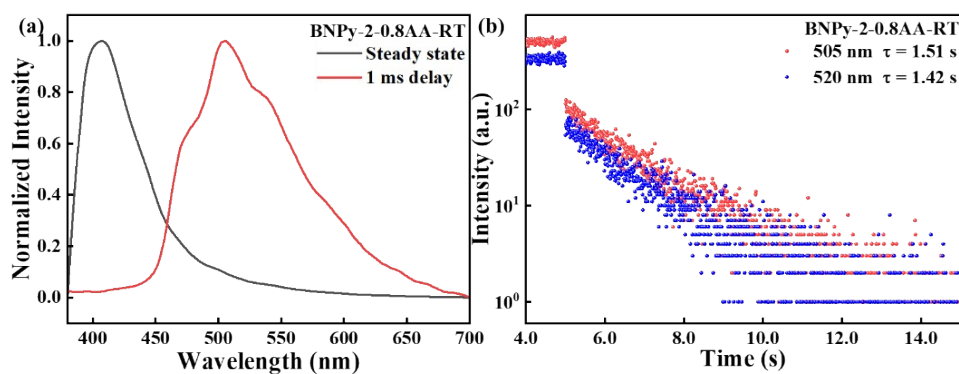

Figure S67. (a) Steady-state and 1 ms-delayed PL spectra of BNPy-2@0.8PAA-PMA film (0.1 wt%); and (b) decay spectra at ambient condition. ( $\lambda_{\text{ex}} = 365$  nm).

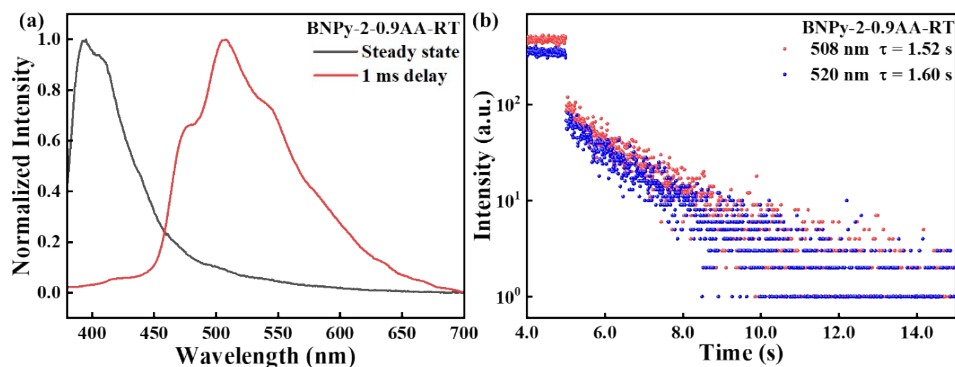

Figure S68. (a) Steady-state and 1 ms-delayed PL spectra of BNPY-2@0.9PAA-PMA film (0.1 wt%); and (b) decay spectra at ambient condition. ( $\lambda_{\text{ex}} = 365 \text{ nm}$ ).

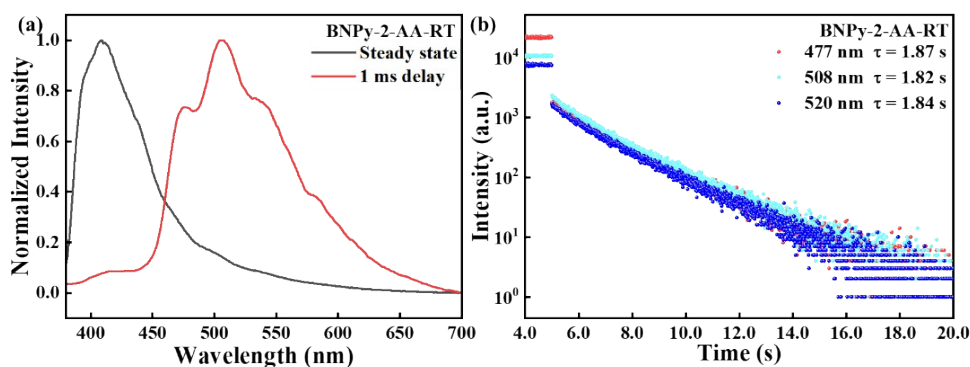

Figure S69. (a) Steady-state and 1 ms-delayed PL spectra of BNPY-2@1.0PAA-PMA film (0.1 wt%); and (b) decay spectra at ambient condition. ( $\lambda_{\text{ex}} = 365 \text{ nm}$ ).

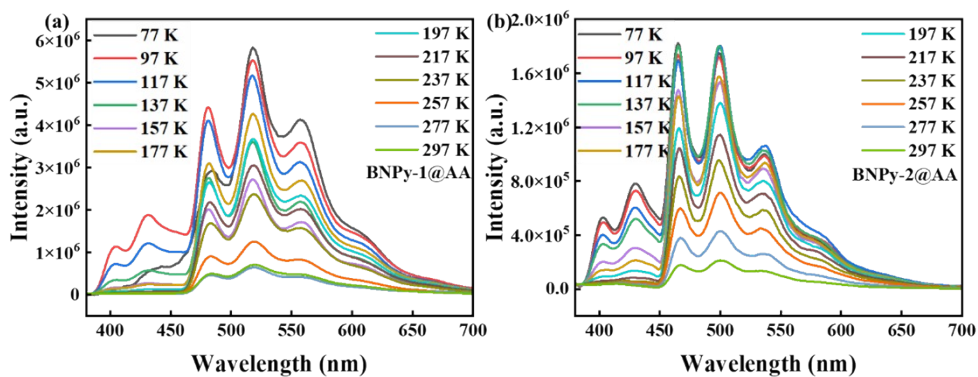

Figure S70. Variable-temperature 1 ms-delayed spectra of (a) BNPY-1@1.0PAA-PMA film (0.1 wt%), (b) BNPY-2@1.0PAA-PMA film (0.1 wt%).

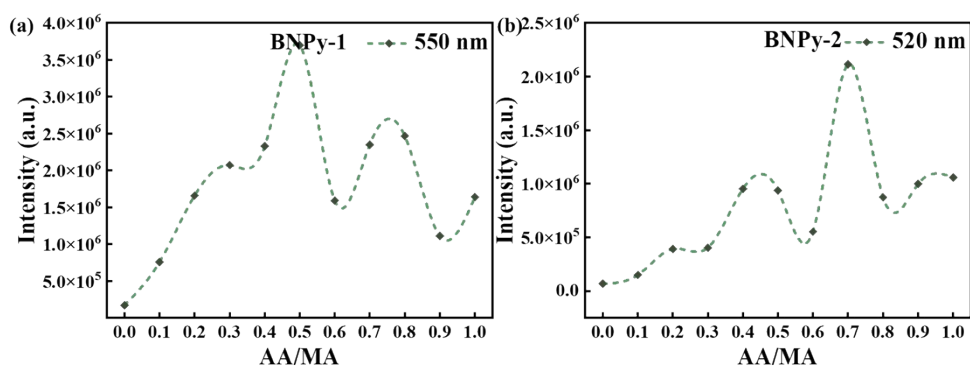

Figure S71. Phosphorescence intensity changing trend of (a) BNPY-1, (b) BNPY-2 along with AA concentration.

Table S1. Quantum yields and associated rate constants of **BNPy-1@1.0PAA-PMA** film and **BNPy-2@1.0PAA-PMA** film.

| Sample            | $\lambda_{ex}/nm$ | $\phi_{FL}/\%$ | $\phi_{PL}/\%$ | $K_{ISC}/s^{-1}$   | $K_r^{Phos}/s^{-1}$ | $K_{nr}^{Phos}/s^{-1}$ |
|-------------------|-------------------|----------------|----------------|--------------------|---------------------|------------------------|
| BNPy-1@1.0PAA-PMA | 365               | 14.56          | 1.74           | $2.18 \times 10^6$ | 0.013               | 0.71                   |
| BNPy-2@1.0PAA-PMA | 365               | 13.68          | 0.20           | $2.22 \times 10^5$ | 0.001               | 0.55                   |

## 9. TD-DFT results

Table S2. The singlet and triplet excited state transition configurations of BNPy monomer. The matched excited states that contain the same orbital transition components of  $S_1$  are shown in red.

| Excited State           | Energy (eV)   | Transition configuration (%)                                                                    |
|-------------------------|---------------|-------------------------------------------------------------------------------------------------|
| $T_1$                   | 2.4463        | H-2→L (2.38), <b>H→L (92.85)</b>                                                                |
| $T_2$                   | 3.4089        | H-2→L (17.89), H-2→L+3 (2.11),<br>H-1→L (35.33), H-1→L+3 (3.66),<br>H→L+1 (32.09), H→L+3 (3.96) |
| <b><math>S_1</math></b> | <b>3.4894</b> | <b>H→L (96.50)</b>                                                                              |
| $T_3$                   | 3.5948        | H-2→L (7.86), H-1→L (57.41),<br>H→L+1 (30.29)                                                   |

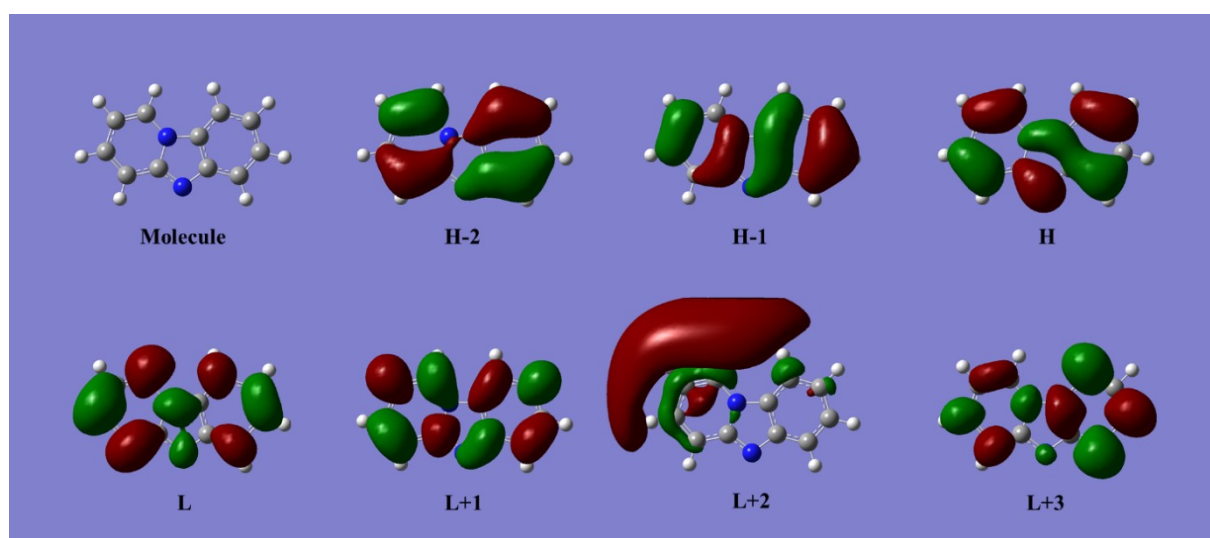

Figure S72. Plots of BNPy monomer visualized orbitals.

Table S3. The singlet and triplet excited state transition configurations of BNPy -1 monomer. The matched excited states that contain the same orbital transition components of  $S_1$  are shown in red.

| Excited State           | Energy (eV)   | Transition configuration (%)                                                                                                                                                                                                                                                                                                                                   |
|-------------------------|---------------|----------------------------------------------------------------------------------------------------------------------------------------------------------------------------------------------------------------------------------------------------------------------------------------------------------------------------------------------------------------|
| $T_1$                   | 2.4757        | H-2 $\rightarrow$ L (2.62), H-2 $\rightarrow$ L+2 (2.04),<br><b>H<math>\rightarrow</math>L (89.13)</b>                                                                                                                                                                                                                                                         |
| $T_2$                   | 3.2404        | H-3 $\rightarrow$ L+1 (2.48), H-3 $\rightarrow$ L+2 (3.11),<br>H-2 $\rightarrow$ L (7.09),<br>H-1 $\rightarrow$ L (72.65), H $\rightarrow$ L+2 (4.94)                                                                                                                                                                                                          |
| <b><math>S_1</math></b> | <b>3.5083</b> | <b>H-1<math>\rightarrow</math>L+1 (3.05), H<math>\rightarrow</math>L (94.34)</b>                                                                                                                                                                                                                                                                               |
| $T_3$                   | 3.5249        | H-3 $\rightarrow$ L+1 (3.85), H-2 $\rightarrow$ L (24.59),<br>H-1 $\rightarrow$ L (19.92),<br>H $\rightarrow$ L+1 (23.68), H $\rightarrow$ L+2 (20.16),                                                                                                                                                                                                        |
| $T_4$                   | 3.7518        | H-3 $\rightarrow$ L (12.38), H-3 $\rightarrow$ L+1 (3.07),<br>H-3 $\rightarrow$ L+4 (3.01), H-2 $\rightarrow$ L (5.35),<br>H-2 $\rightarrow$ L+2 (4.07), <b>H-1<math>\rightarrow</math>L+1 (32.08)</b> ,<br>H-1 $\rightarrow$ L+2 (5.43), H $\rightarrow$ L+1 (10.67),<br>H $\rightarrow$ L+2 (9.31), H $\rightarrow$ L+4 (4.01)<br>H $\rightarrow$ L+7 (2.68) |

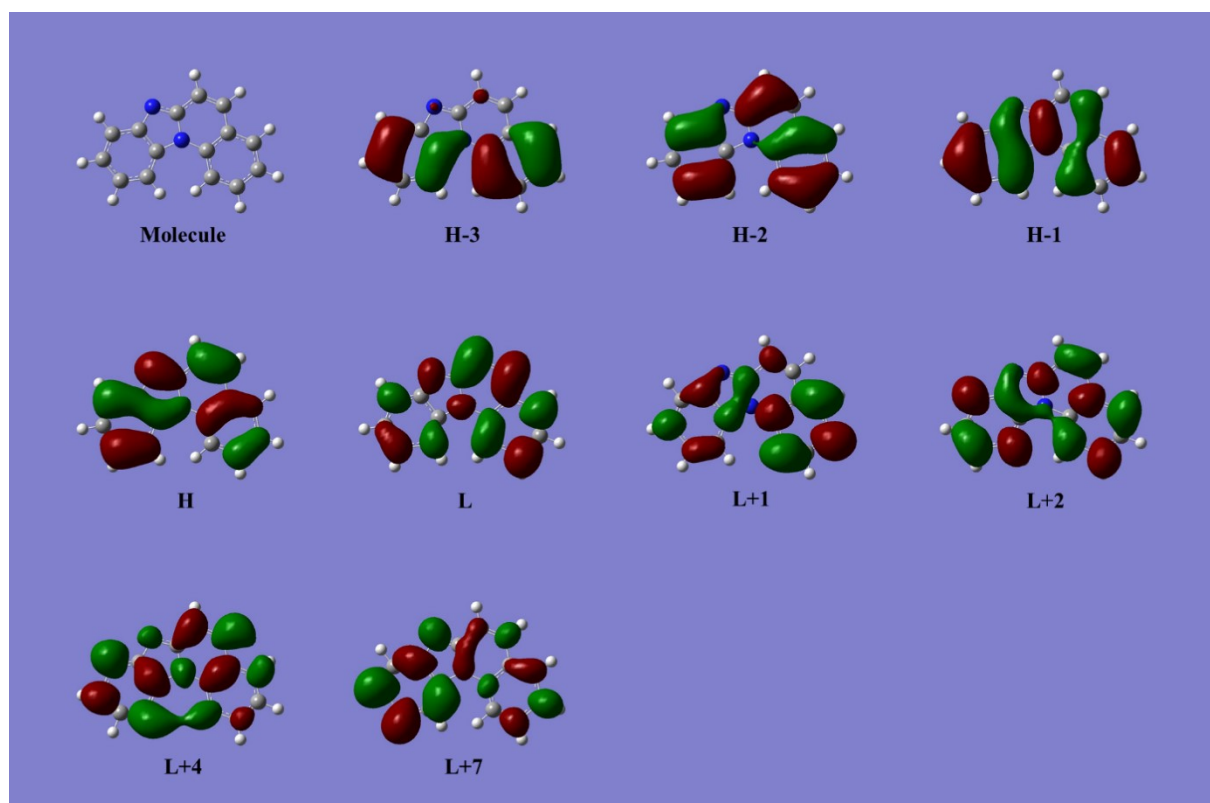

Figure S73. Plots of BNPy -1 monomer visualized orbitals.

Table S4. The singlet and triplet excited state transition configurations of BNPpy-2 monomer. The matched excited states that contain the same orbital transition components of S<sub>1</sub> are shown in red.

| Excited State        | Energy (eV)   | Transition configuration (%)                                                                                                   |
|----------------------|---------------|--------------------------------------------------------------------------------------------------------------------------------|
| T <sub>1</sub>       | 2.5840        | H-2→L (2.51), H-2→L+2 (3.24),<br>H-1→L (18.95), <b>H→L (61.99)</b> ,<br>H→L+1 (9.05)                                           |
| T <sub>2</sub>       | 2.8600        | H-1→L (31.56), <b>H-1→L+1 (13.70)</b> ,<br>H-1→L+2 (4.23), <b>H→L (24.62)</b> ,<br>H→L+1 (17.11)                               |
| T <sub>3</sub>       | 3.3267        | H-1→L (36.70), H→L+1 (55.04),                                                                                                  |
| <b>S<sub>1</sub></b> | <b>3.4756</b> | <b>H-1→L+1 (6.47), H→L (89.31)</b>                                                                                             |
| T <sub>4</sub>       | 3.5983        | H-2→L (24.61), H-1→L (3.36),<br><b>H-1→L+1 (32.21)</b> , H-1→L+2 (6.56),<br><b>H→L (8.22)</b> , H→L+1 (11.42),<br>H→L+2 (8.66) |
| S <sub>2</sub>       | 3.7660        | H-1→L (68.37), H→L+1 (27.91),                                                                                                  |
| T <sub>5</sub>       | 3.7718        | H-4→L (2.01), H-2→L (8.47),<br>H-2→L+5 (2.53), <b>H-1→L+1 (37.11)</b> ,<br>H-1→L+2 (7.34), H→L+2 (33.80),                      |



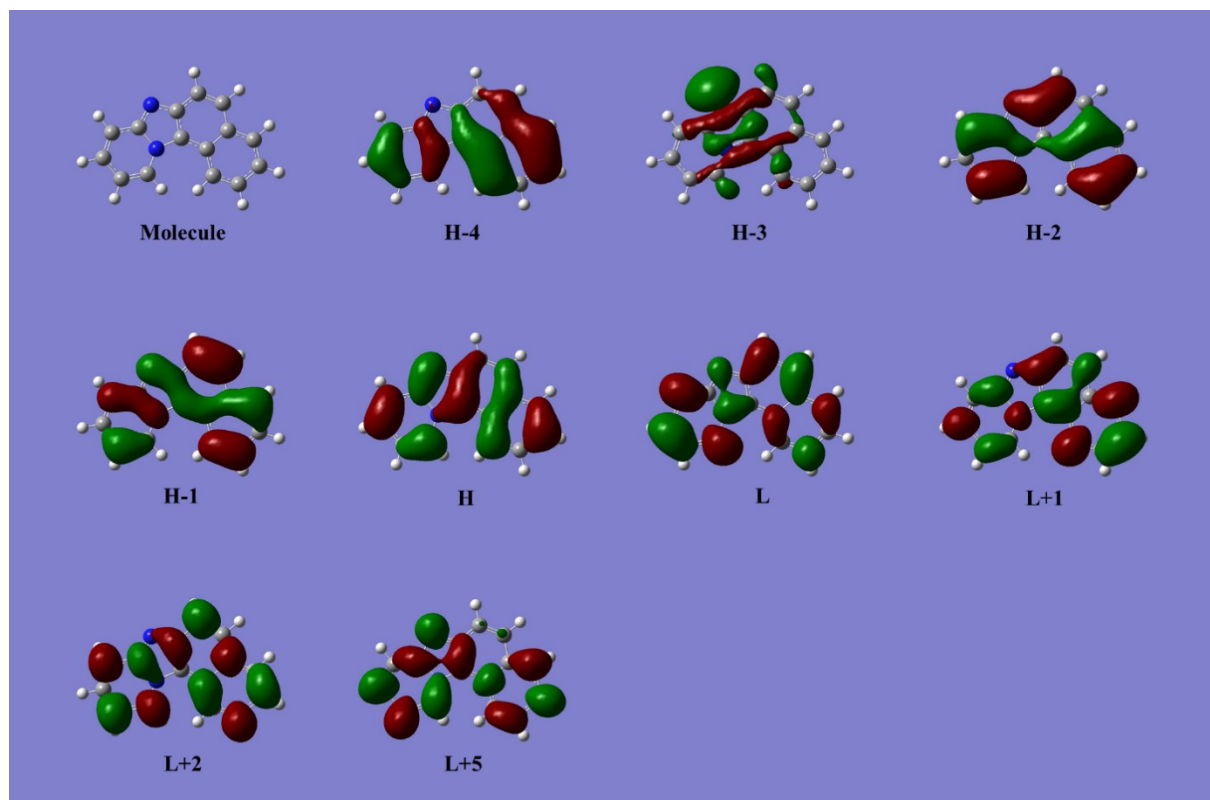

Figure S74. Plots of BNPpy -2 monomer visualized orbitals.

Table S5. Spin-orbit coupling (SOC) values between  $S_n$  and  $T_n$  of BNPY, BNPY-1 and BNPY-2 monomer.

| $\langle S_n   H_{\text{so}}   T_n \rangle$ | BNPy( $\text{cm}^{-1}$ ) | BNPy-1( $\text{cm}^{-1}$ ) | BNPy-2( $\text{cm}^{-1}$ ) |
|---------------------------------------------|--------------------------|----------------------------|----------------------------|
| $S_0/T_1$                                   | 0.65029                  | 0.77972                    | 0.67206                    |
| $S_0/T_2$                                   | 0.52085                  | 0.11534                    | 0.19256                    |
| $S_0/T_3$                                   | 0.14017                  | 0.02878                    | 0.74625                    |
| $S_0/T_4$                                   | -                        | 0.99845                    | 0.68549                    |
| $S_0/T_5$                                   | -                        | -                          | 0.33774                    |
| $S_1/T_1$                                   | 0.25484                  | 0.03605                    | 0.94941                    |
| $S_1/T_2$                                   | 1.01411                  | 0.95545                    | 1.04353                    |
| $S_1/T_3$                                   | 0.19761                  | 0.23127                    | 0.31038                    |
| $S_1/T_4$                                   | -                        | 0.37207                    | 0.29305                    |
| $S_1/T_5$                                   | -                        | -                          | 0.59606                    |
| $S_2/T_1$                                   | -                        | -                          | 0.96683                    |
| $S_2/T_2$                                   | -                        | -                          | 0.25318                    |
| $S_2/T_3$                                   | -                        | -                          | 0.22028                    |
| $S_2/T_4$                                   | -                        | -                          | 1.07443                    |
| $S_2/T_5$                                   | -                        | -                          | 0.66820                    |

Table S6. Total energy of BNPY, BNPY-1 and BNPY-2 monomer.

|                                  | BNPy           | BNPy-1         | BNPy-2         |
|----------------------------------|----------------|----------------|----------------|
| Monomer<br>( $E_{M,\text{HF}}$ ) | -533.631096906 | -687.313231224 | -687.307999930 |

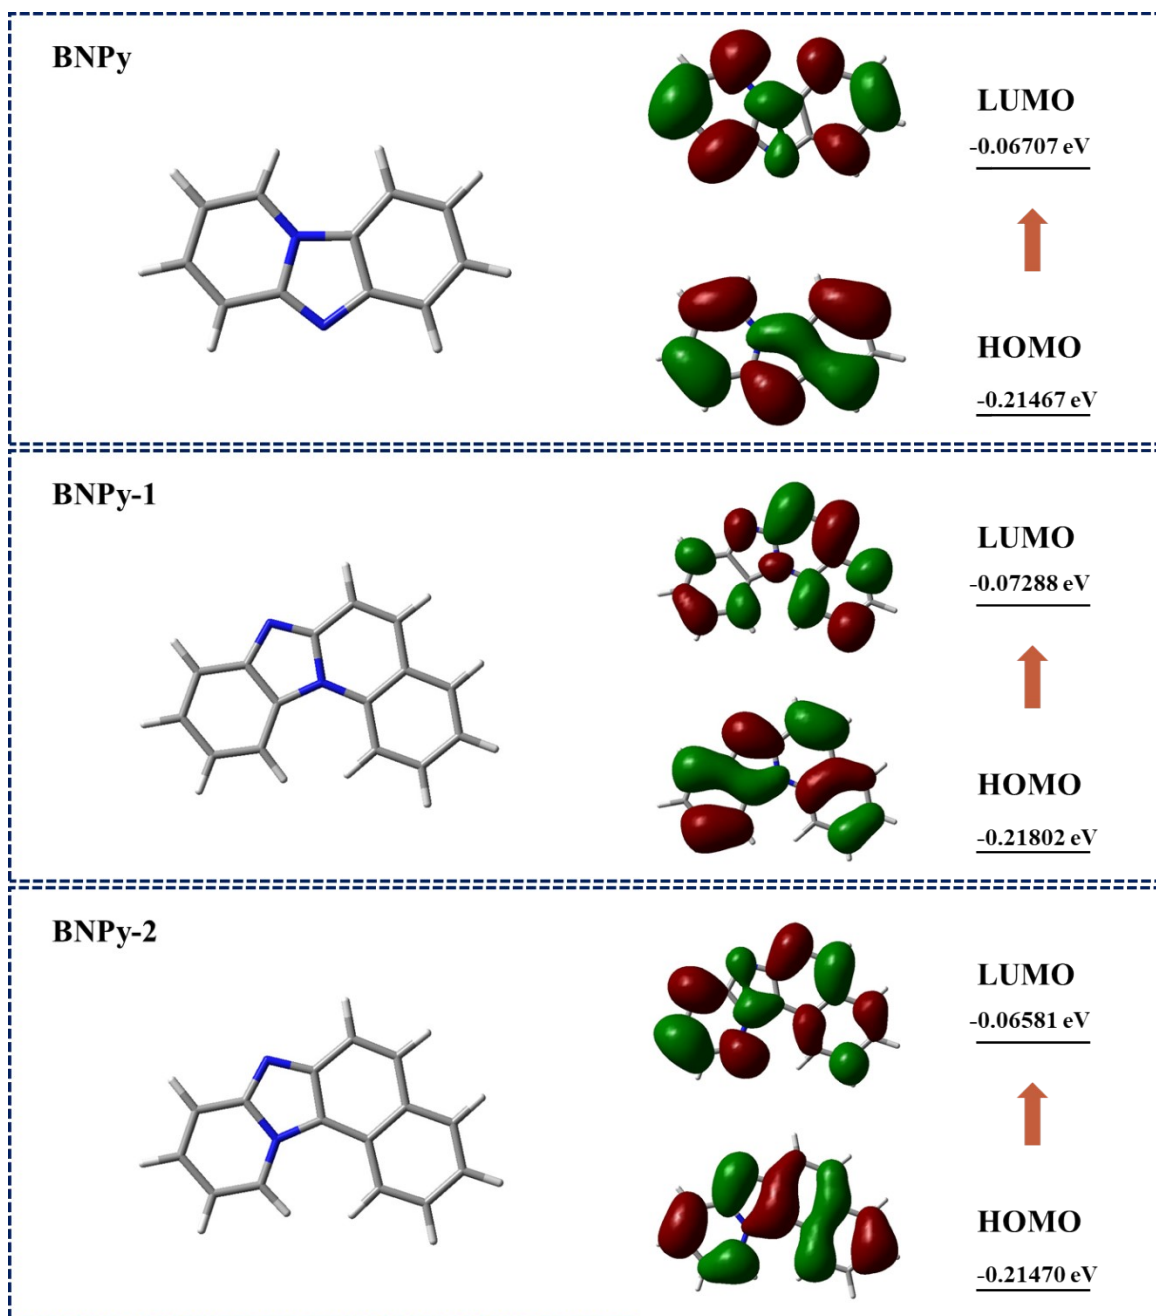

Figure S75. Plots of BNPy, BNPy-1 and BNPy-2 monomer and radical visualized orbitals.

## References

1. Li, J.-A., Zhou, J., Mao, Z., Xie, Z., Yang, Z., Xu, B., Liu, C., Chen, X., Ren, D., Pan, H., et al. (2018). Transient and Persistent Room-Temperature Mechanoluminescence from a White-Light-Emitting AIEgen with Tricolor Emission Switching Triggered by Light. *Angew. Chem. Int. Ed.* *57*, 6449-6453.
2. An, Z., Zheng, C., Tao, Y., Chen, R., Shi, H., Chen, T., Wang, Z., Li, H., Deng, R., Liu, X., and Huang, W. (2015). Stabilizing triplet excited states for ultralong organic phosphorescence. *Nat. Mater.* *14*, 685-690.
